# Supplementary material for: The modular synthesis of multivalent functionalised glycodendrons for the detection of lectins including DC-SIGN
Source: Royal Society of Chemistry journal article supplement (doi:10.1039/c7ra08872h), 2017-01-01
Supplement: c7ra08872h1.pdf [file c7ra08872h1.pdf]

## Supporting Information

### **The modular synthesis of multivalent functionalised glycodendrons for the detection of lectins including DC-SIGN**

Stefan Munneke,<sup>a</sup> Kristel Kodar,<sup>a</sup> Gavin F. Painter,<sup>b,c</sup> Bridget L. Stocker,<sup>a,b,\*</sup> Mattie S.M. Timmer.<sup>a,b,\*</sup>

---

<sup>a</sup> School of Chemical and Physical Sciences, Victoria University of Wellington, PO Box 600, Wellington, New Zealand

<sup>b</sup> Centre for Biodiscovery, Victoria University of Wellington, PO Box 600, Wellington, New Zealand

<sup>c</sup> Ferrier Research Institute, Victoria University of Wellington, P.O. Box 600, Wellington, New Zealand

$^1\text{H}$  NMR ( $\text{D}_2\text{O}$ , 500 MHz)

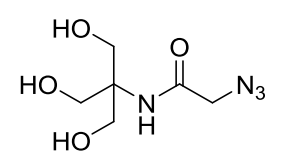

**11**

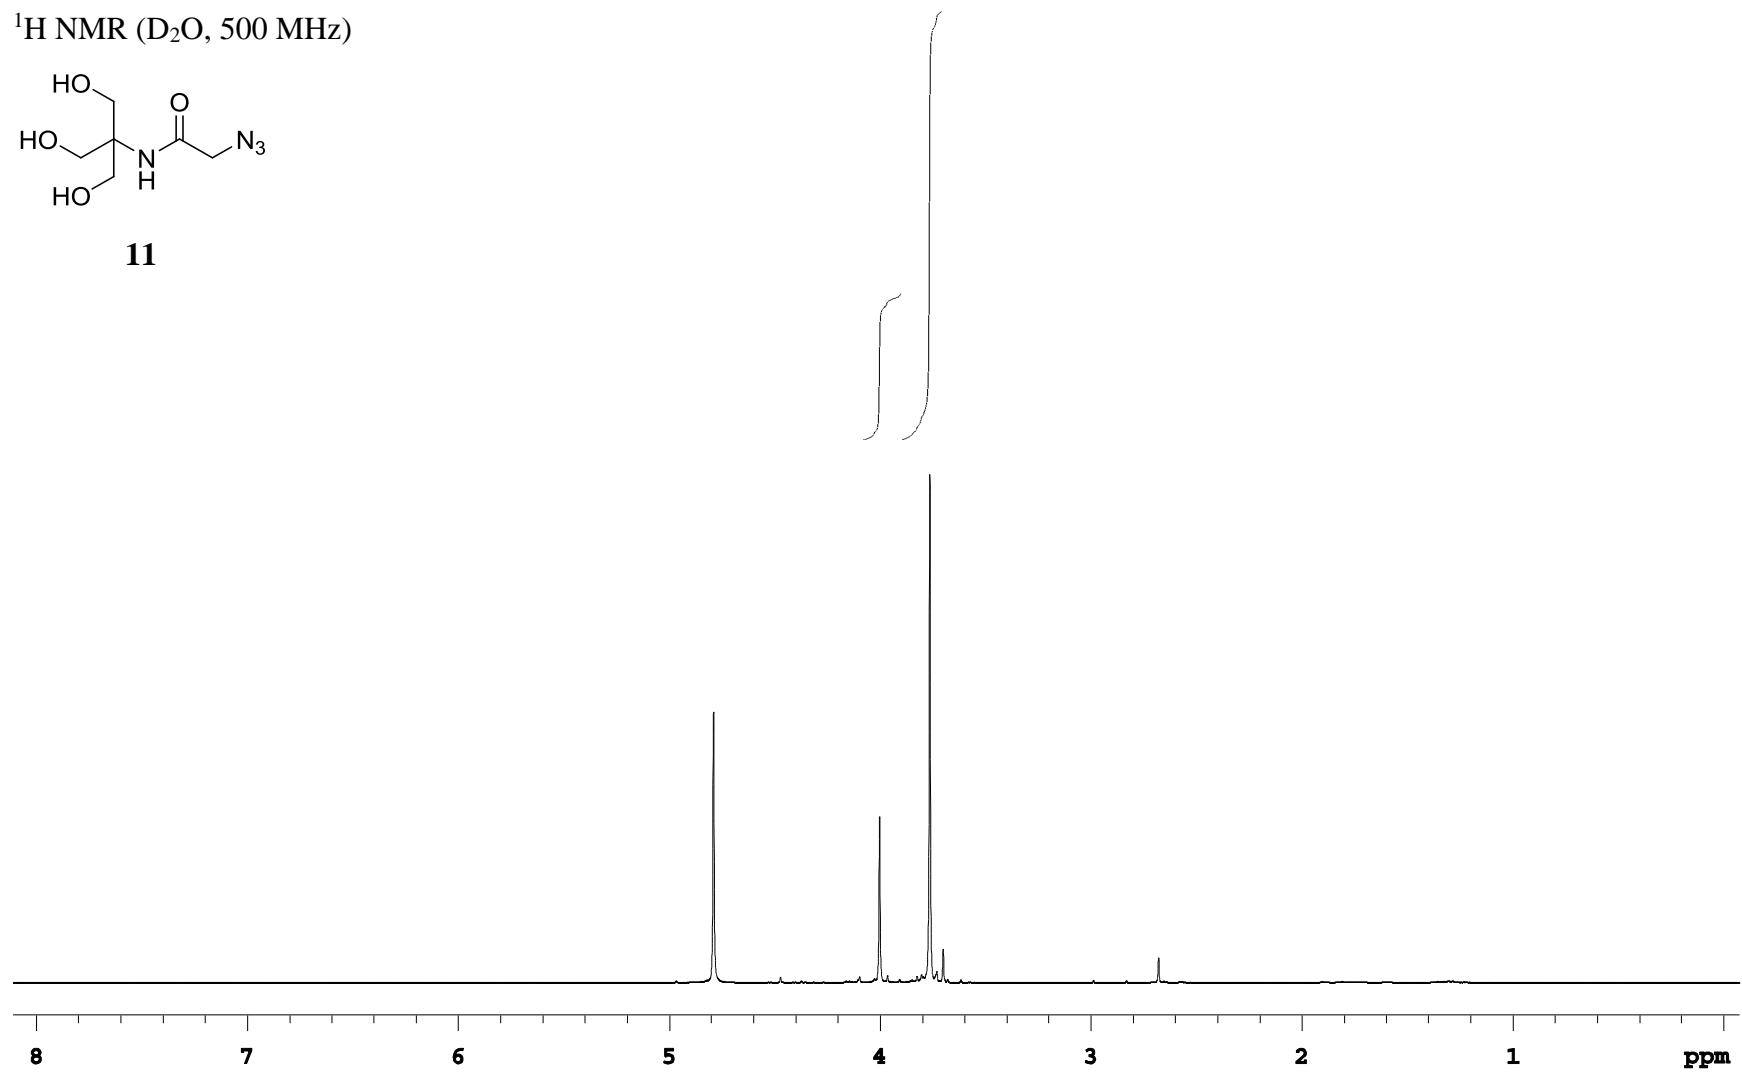

SI-2

$^{13}\text{C}$  NMR ( $\text{D}_2\text{O}$ , 125 MHz)

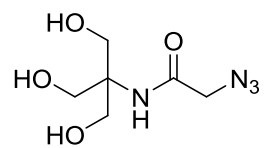

**11**

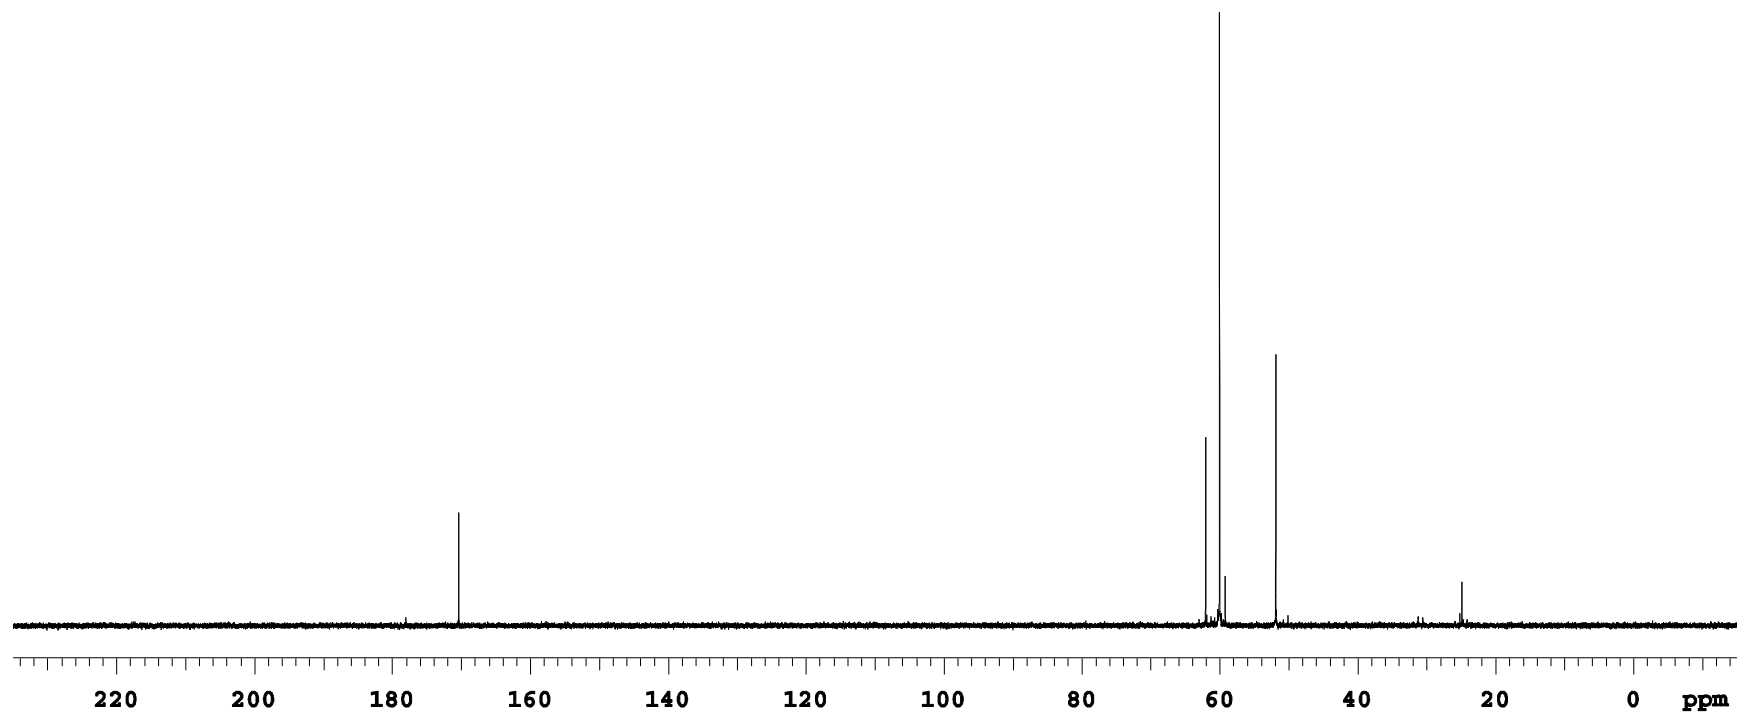

<sup>1</sup>H NMR (CDCl<sub>3</sub>, 500 MHz)

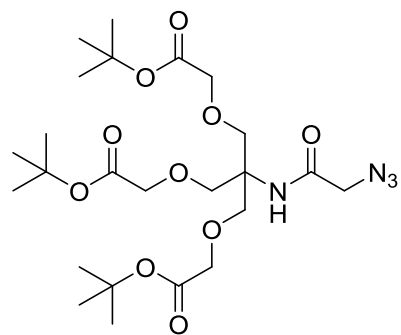

**6**

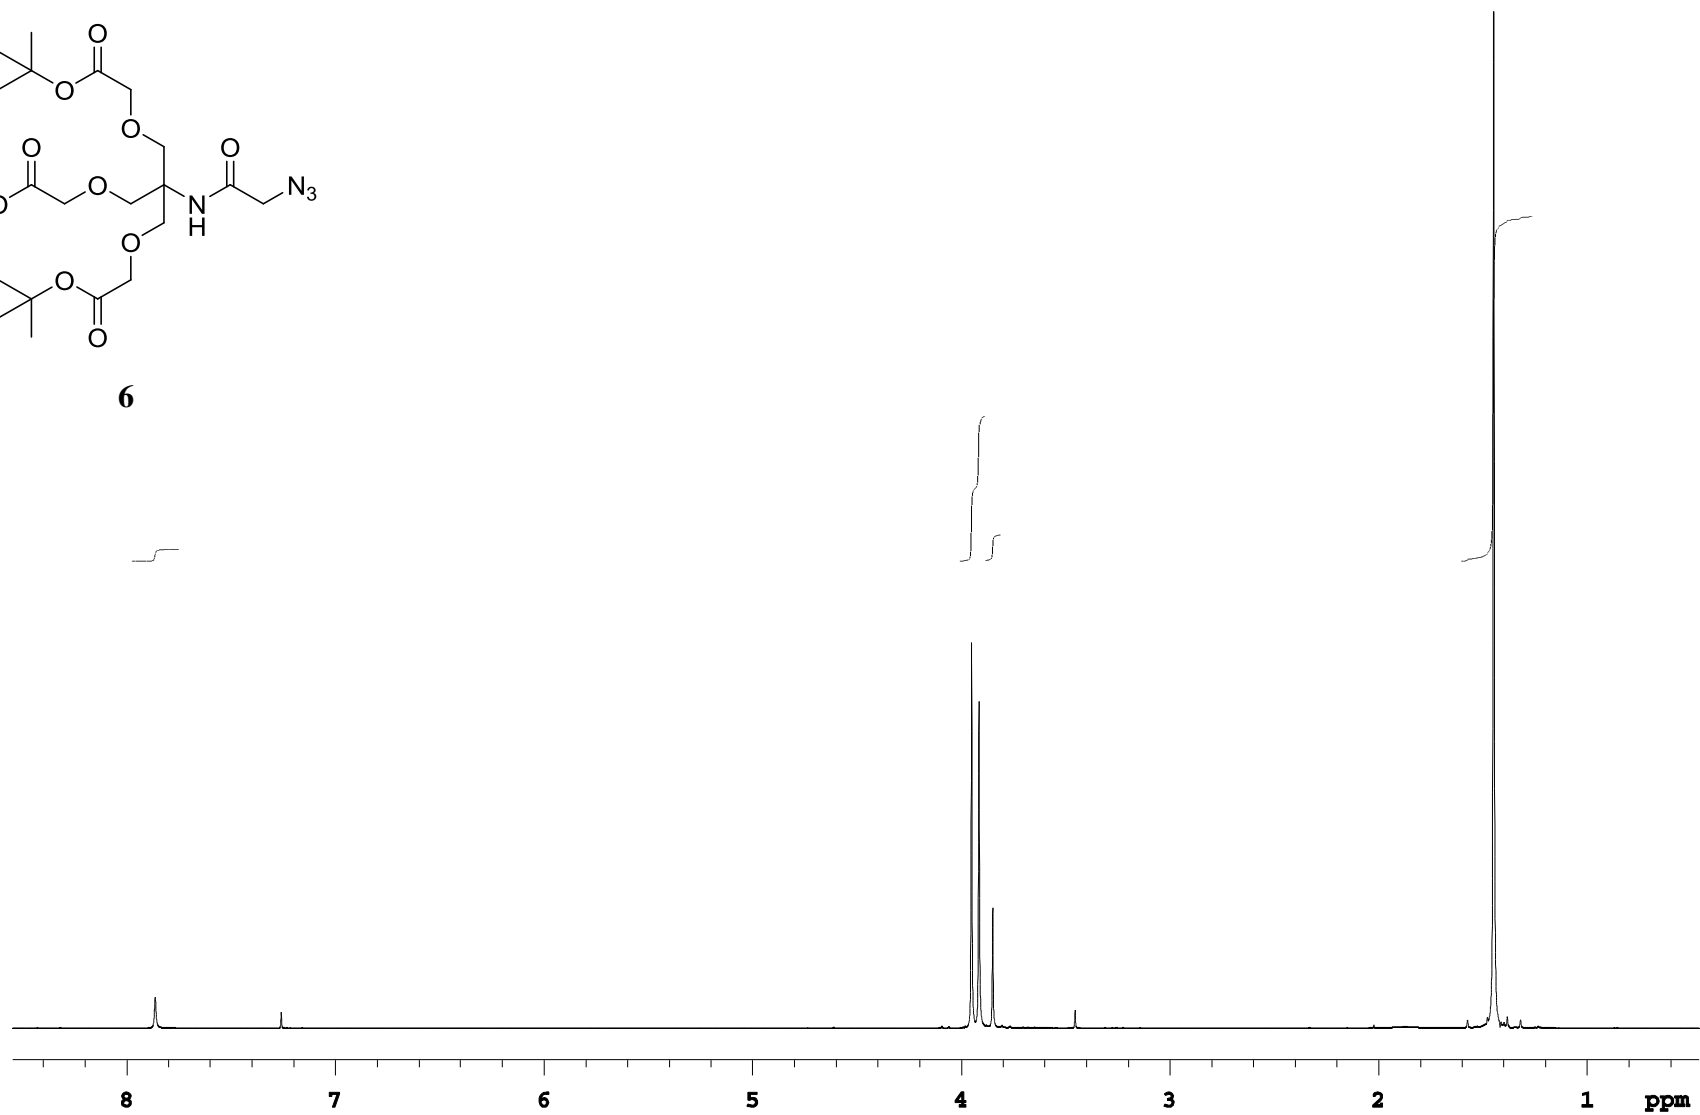

SI-4

$^{13}\text{C}$  NMR ( $\text{CDCl}_3$ , 125 MHz)



**6**

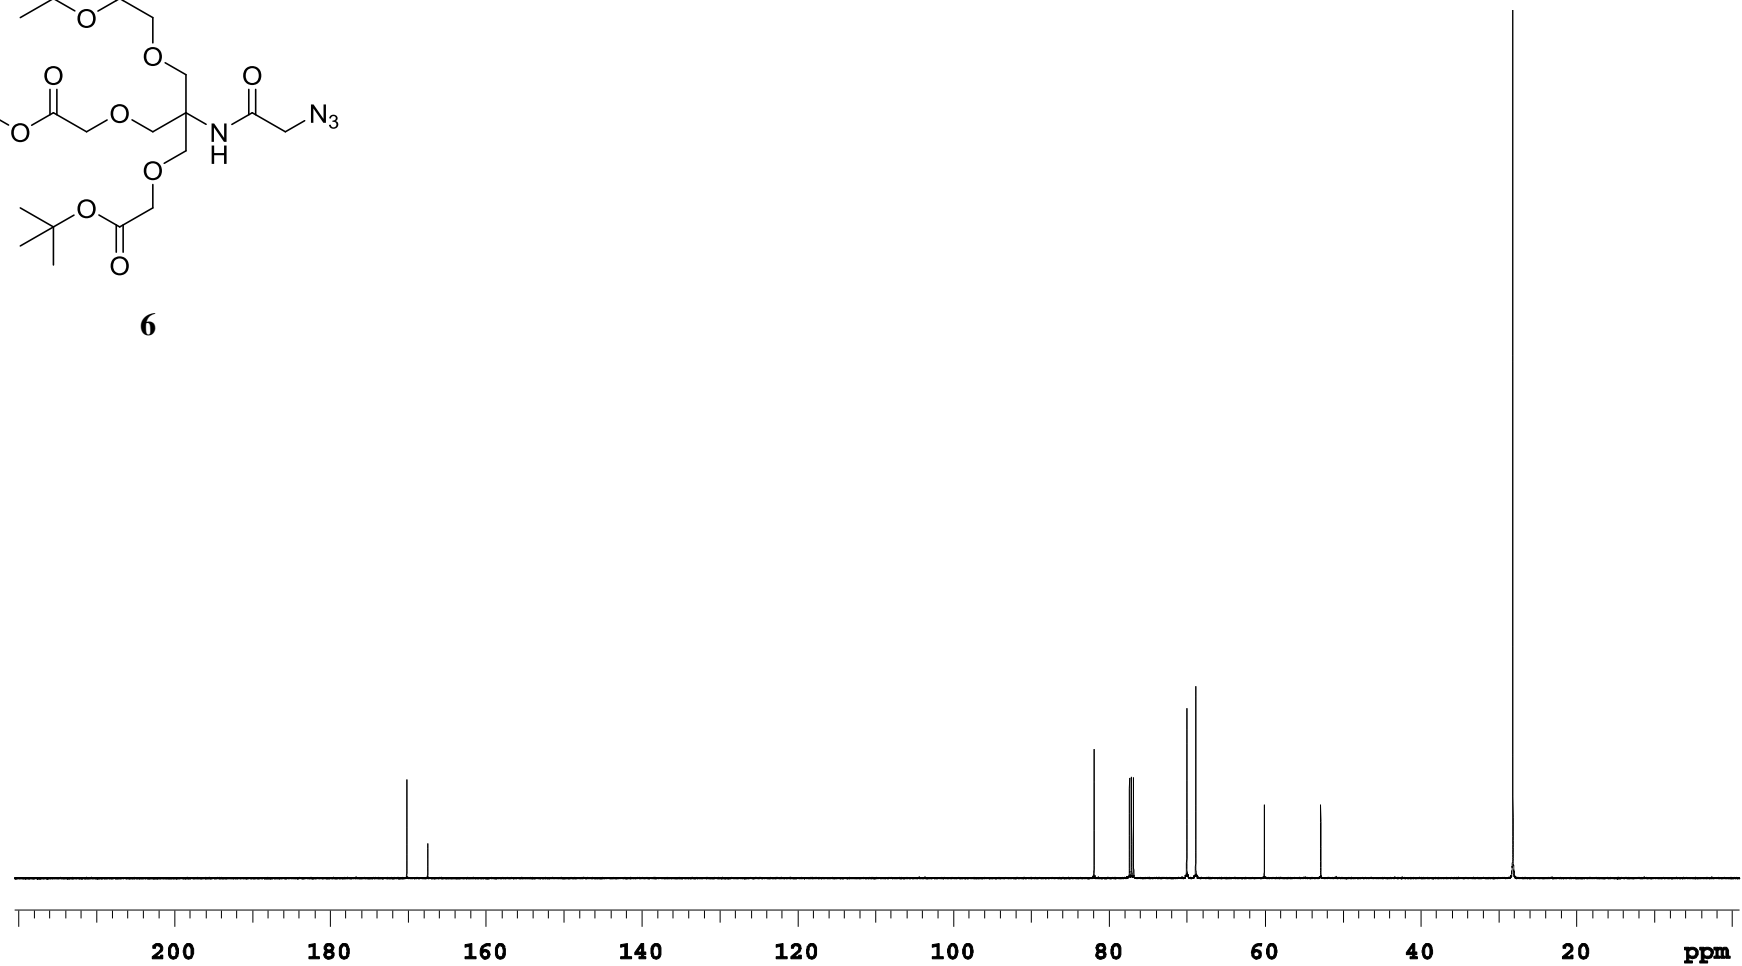

<sup>1</sup>H NMR (D<sub>2</sub>O, 500 MHz)

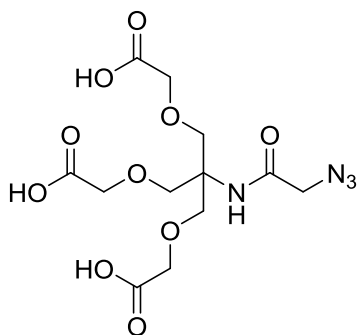

12

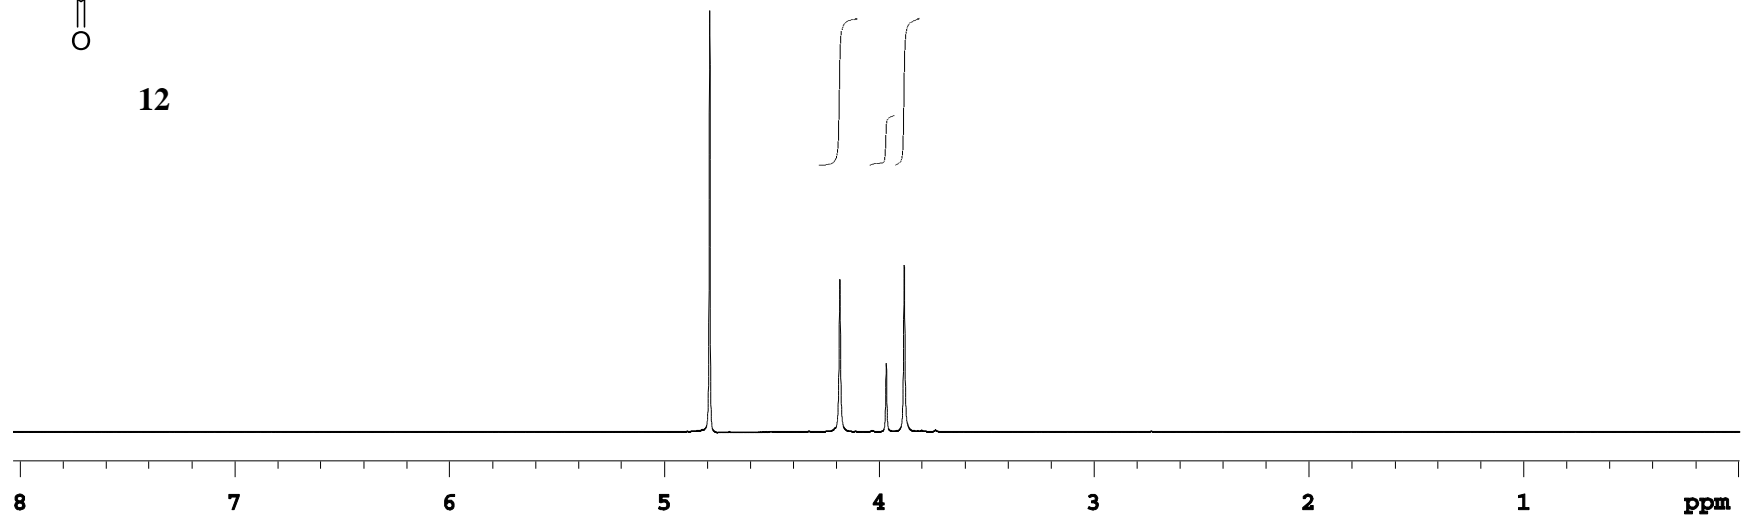

$^{13}\text{C}$  NMR ( $\text{D}_2\text{O}$ , 125 MHz)

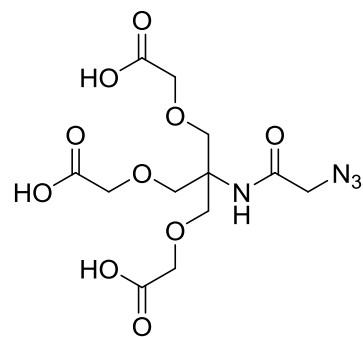

12

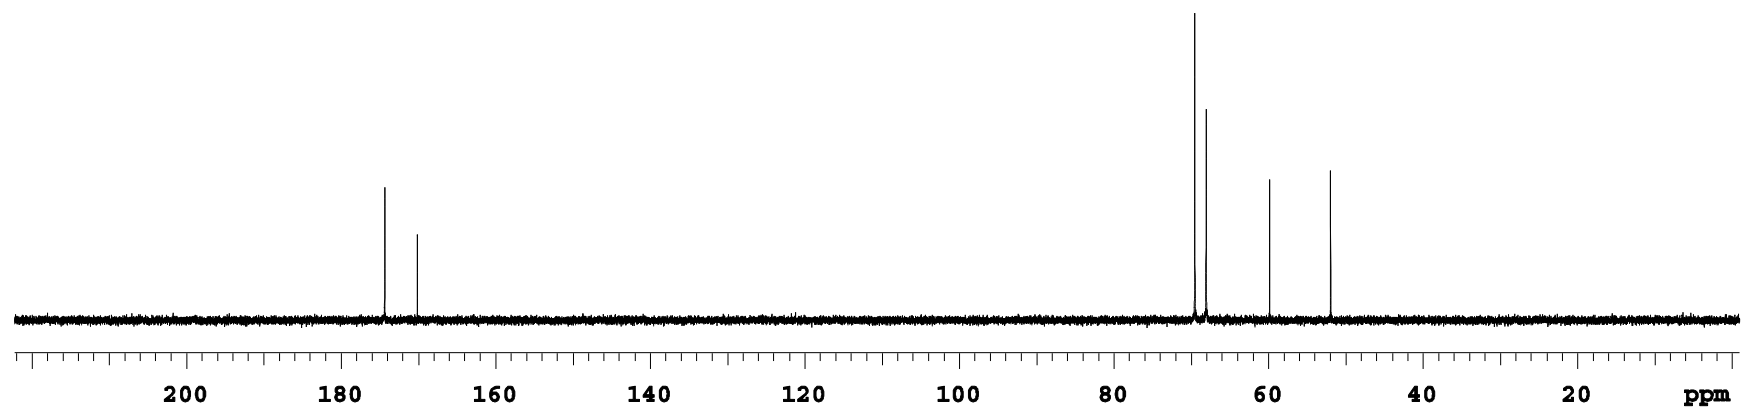

$^1\text{H}$  NMR ( $\text{CDCl}_3$ , 500 MHz)

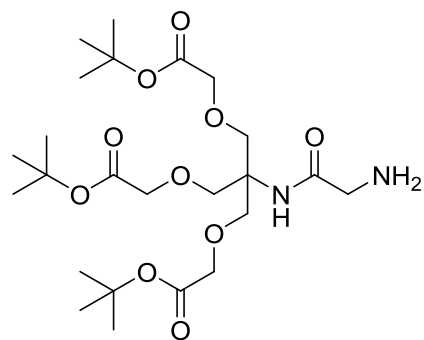

**13**

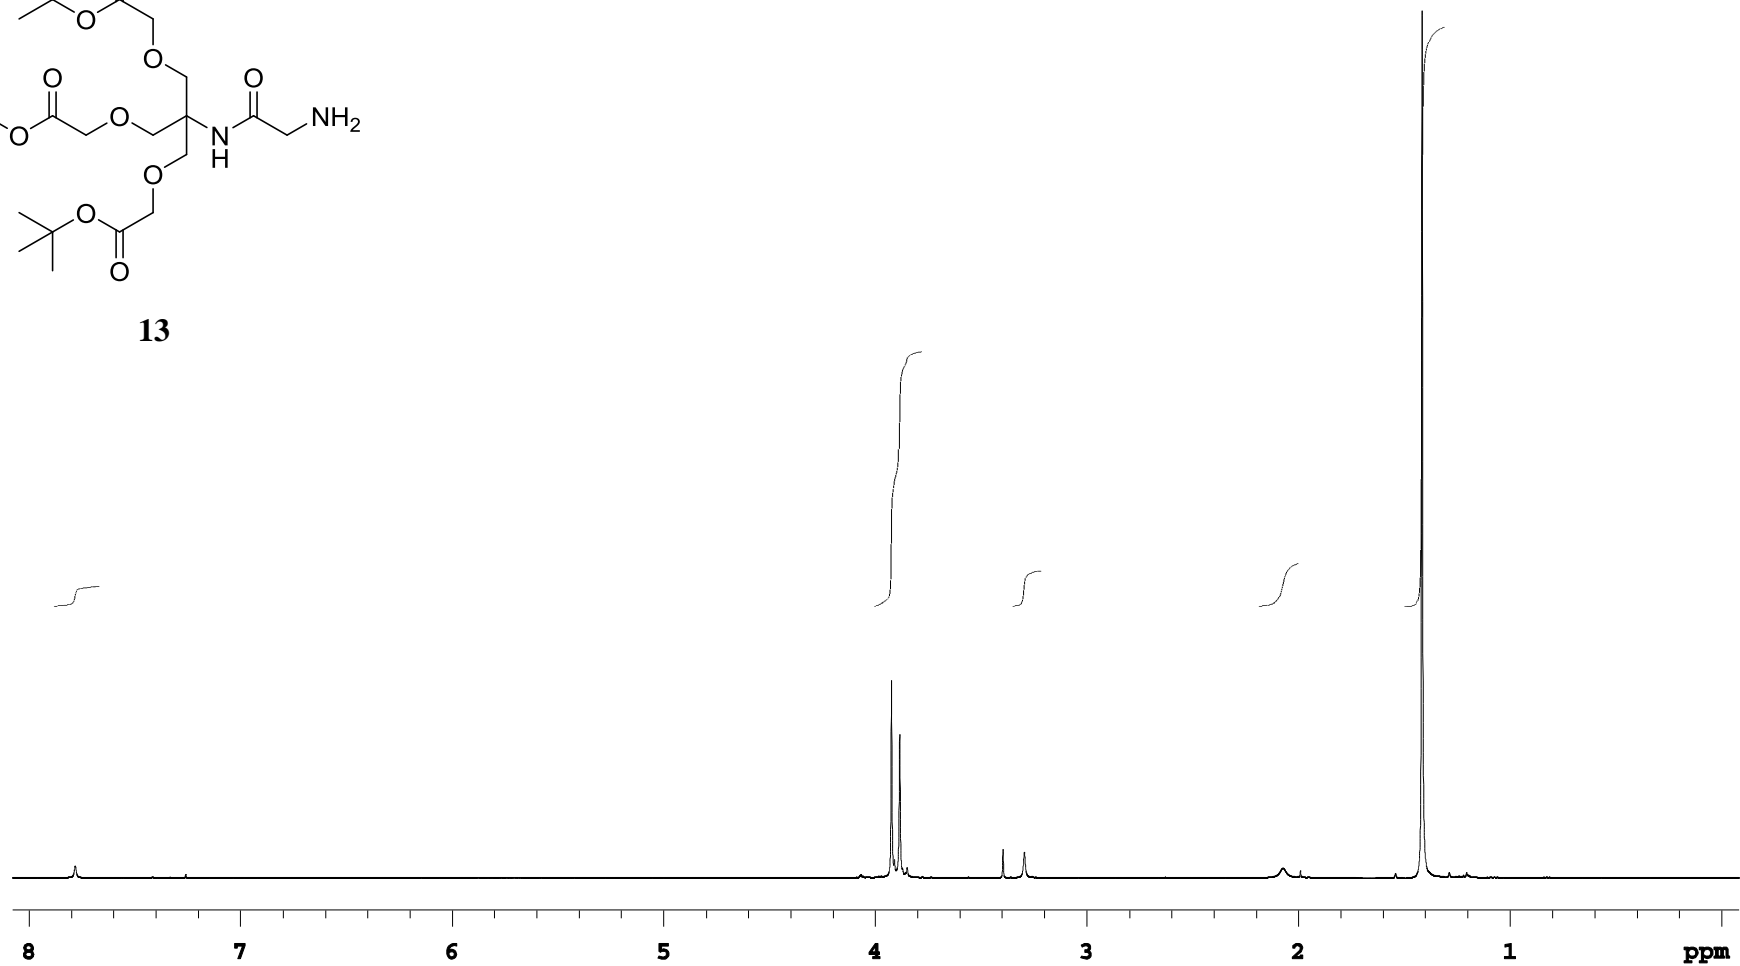

SI-8



$^{13}\text{C}$  NMR ( $\text{CDCl}_3$ , 125 MHz)



**13**

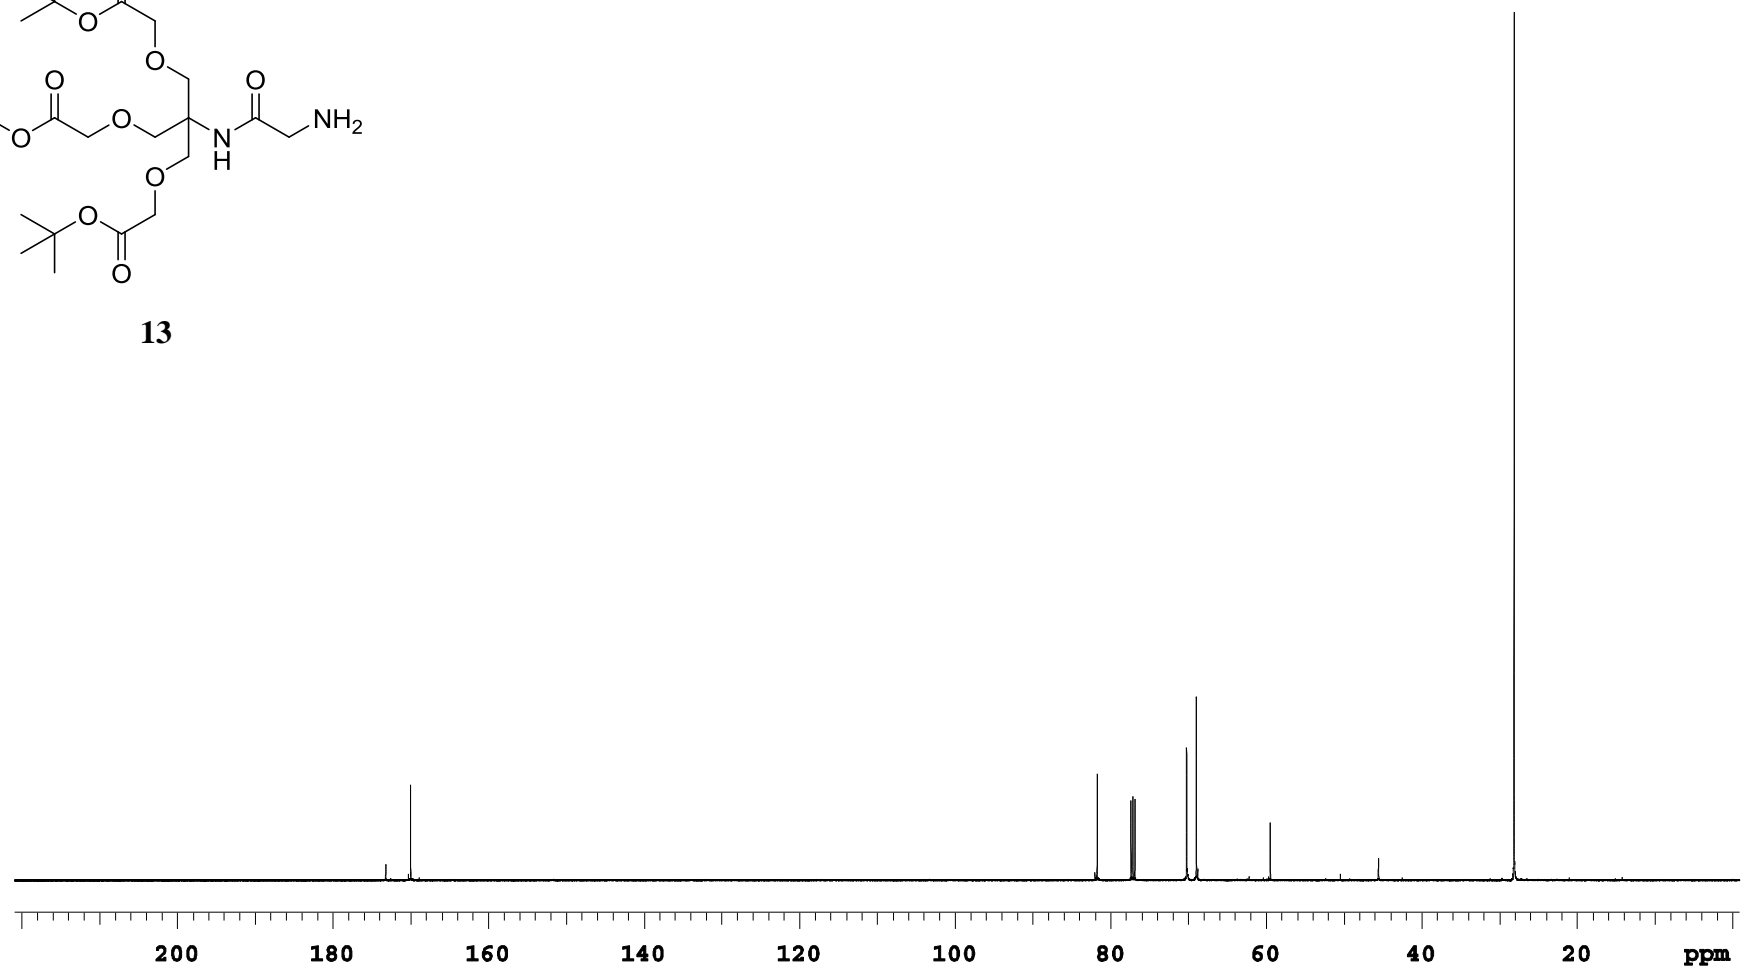

$^1\text{H}$  NMR ( $\text{CDCl}_3$ , 500 MHz)

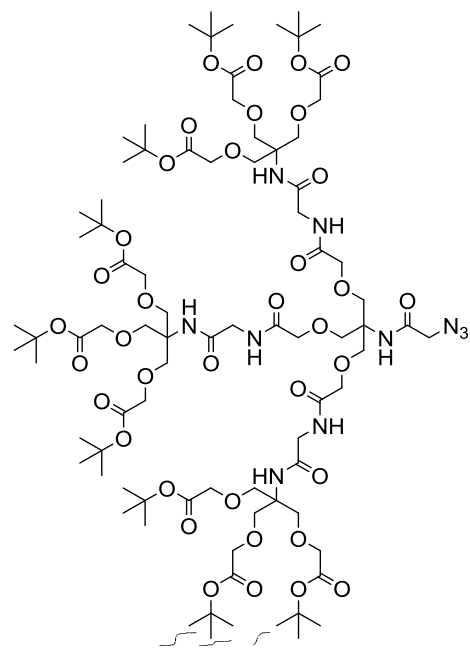

**5**

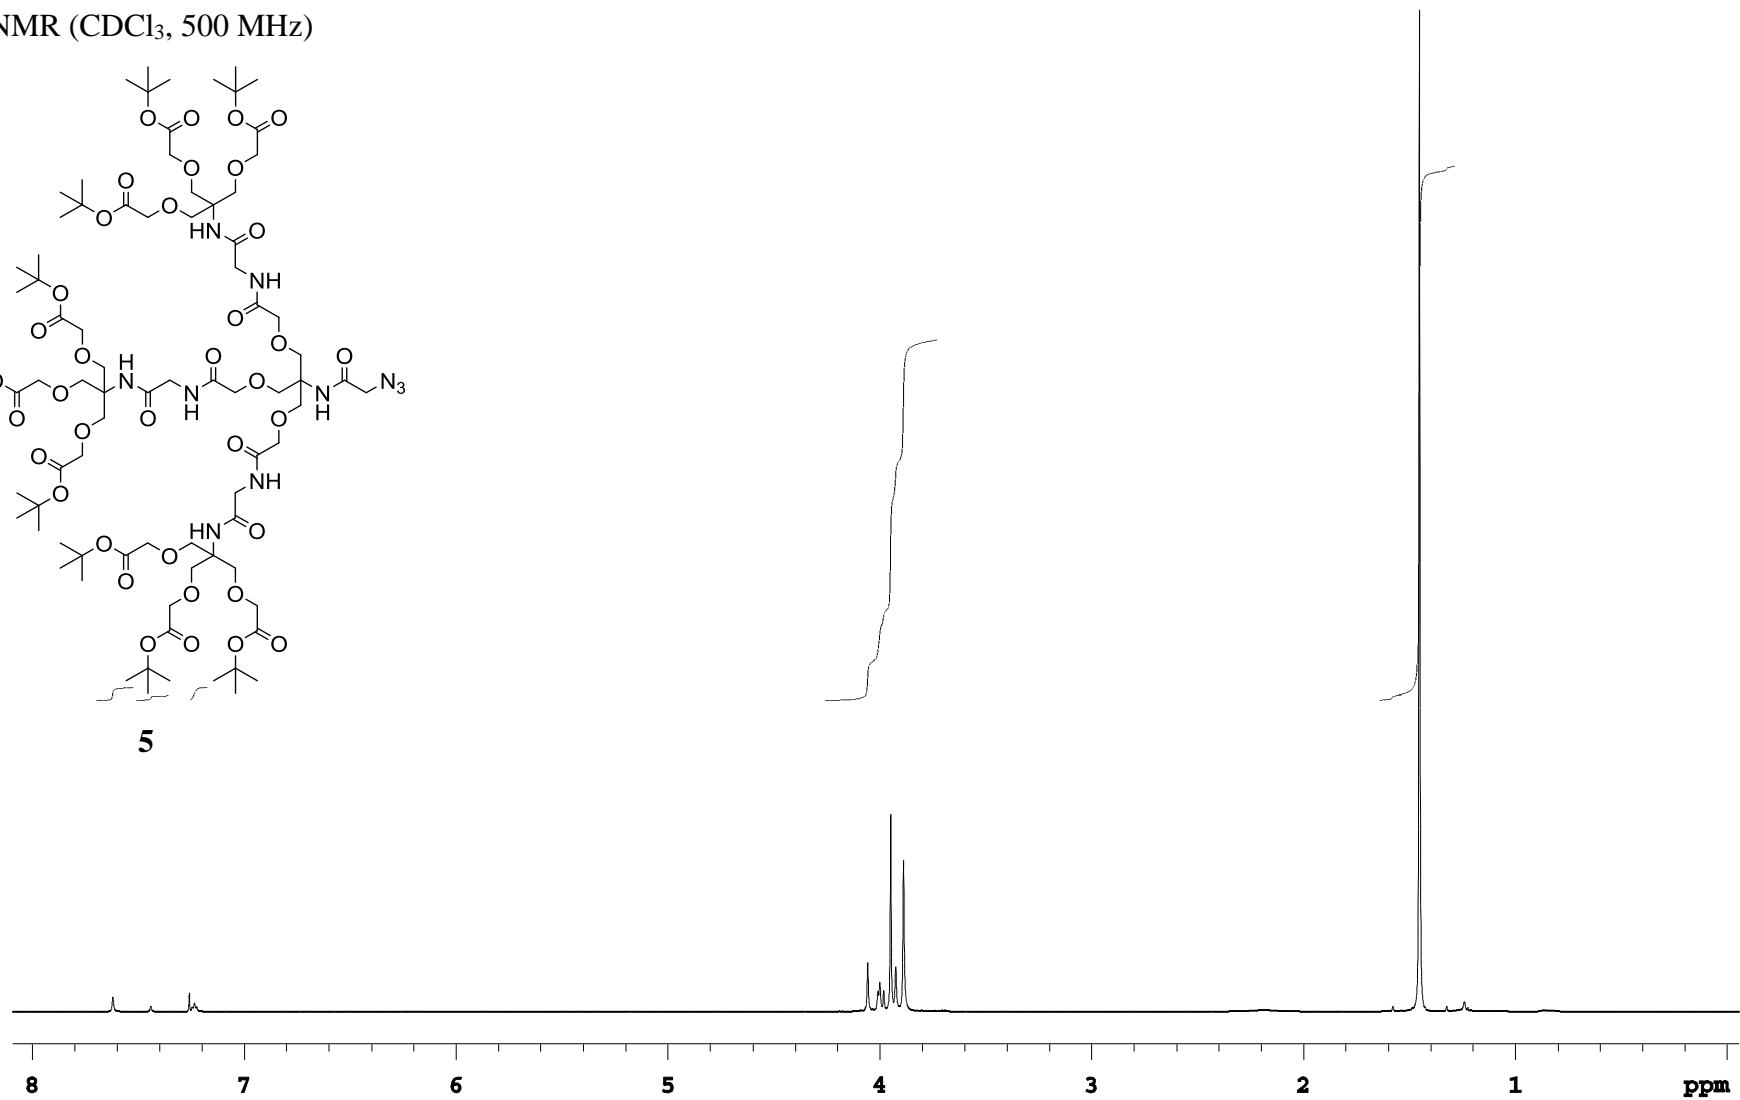

SI-10

$^{13}\text{C}$  NMR ( $\text{CDCl}_3$ , 125 MHz)

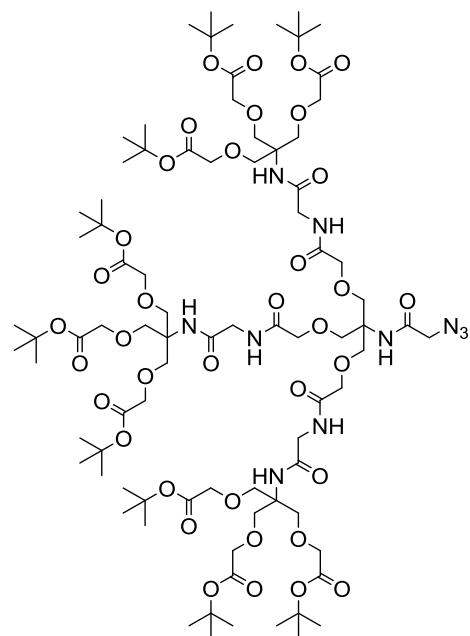

**5**

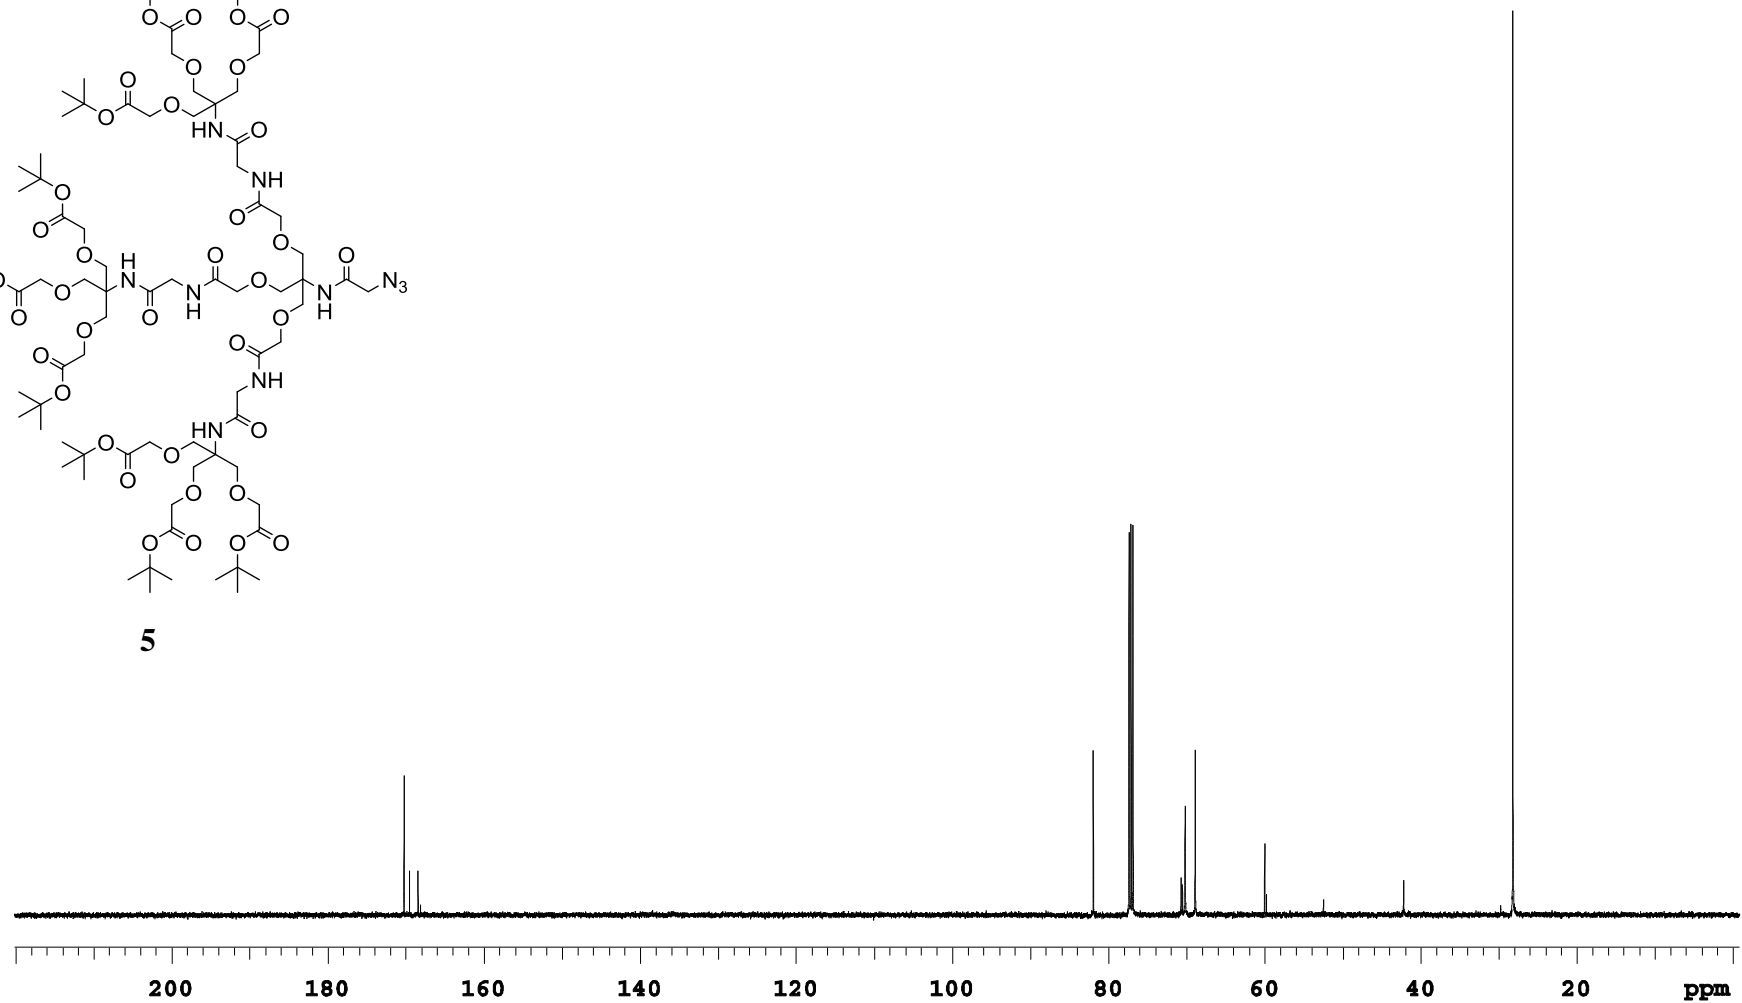

$^1\text{H}$  NMR ( $\text{CDCl}_3$ , 500 MHz)

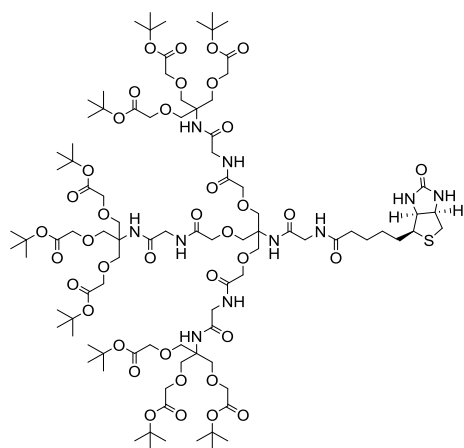

**14**

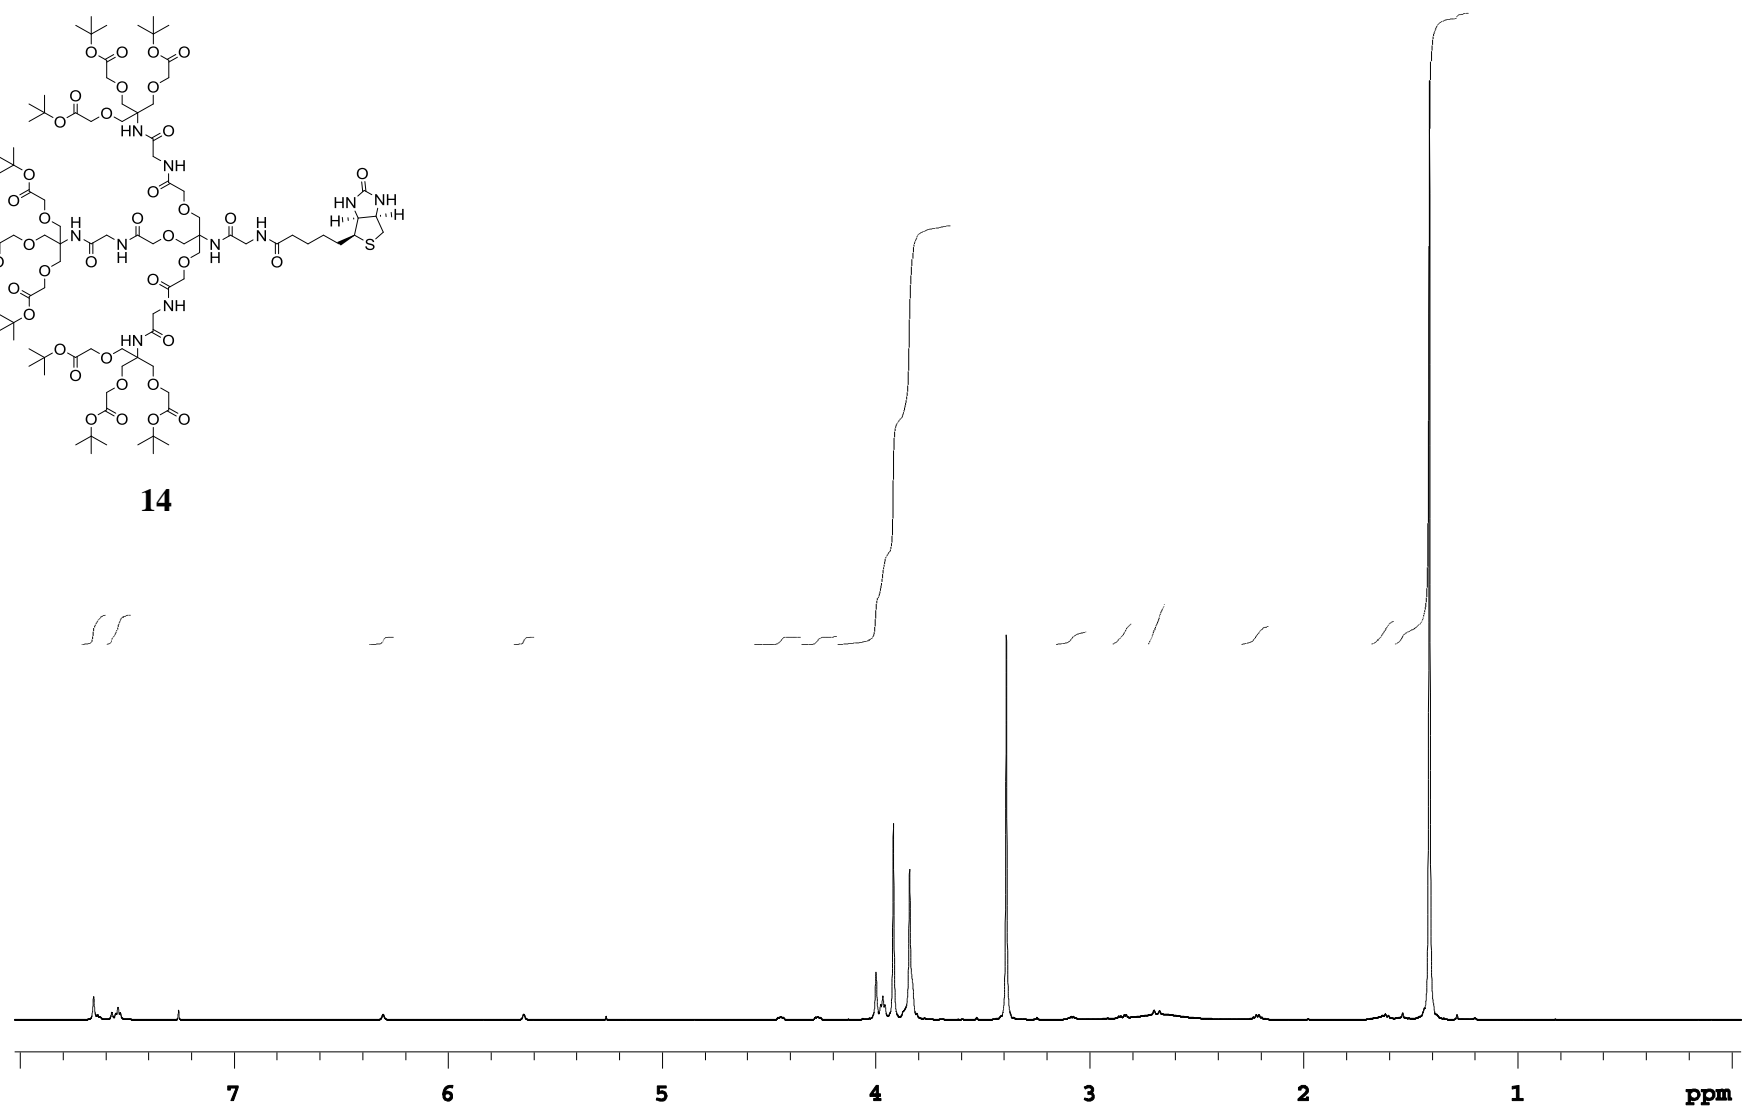

SI-12

$^{13}\text{C}$  NMR ( $\text{CDCl}_3$ , 125 MHz)

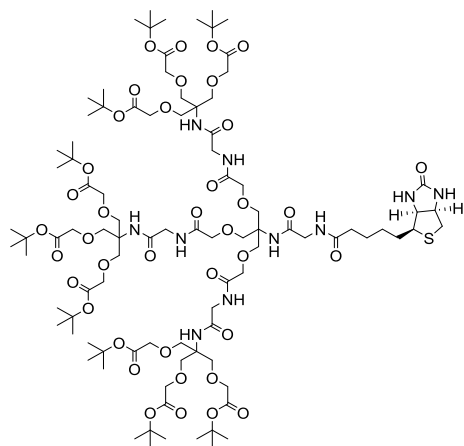

**14**

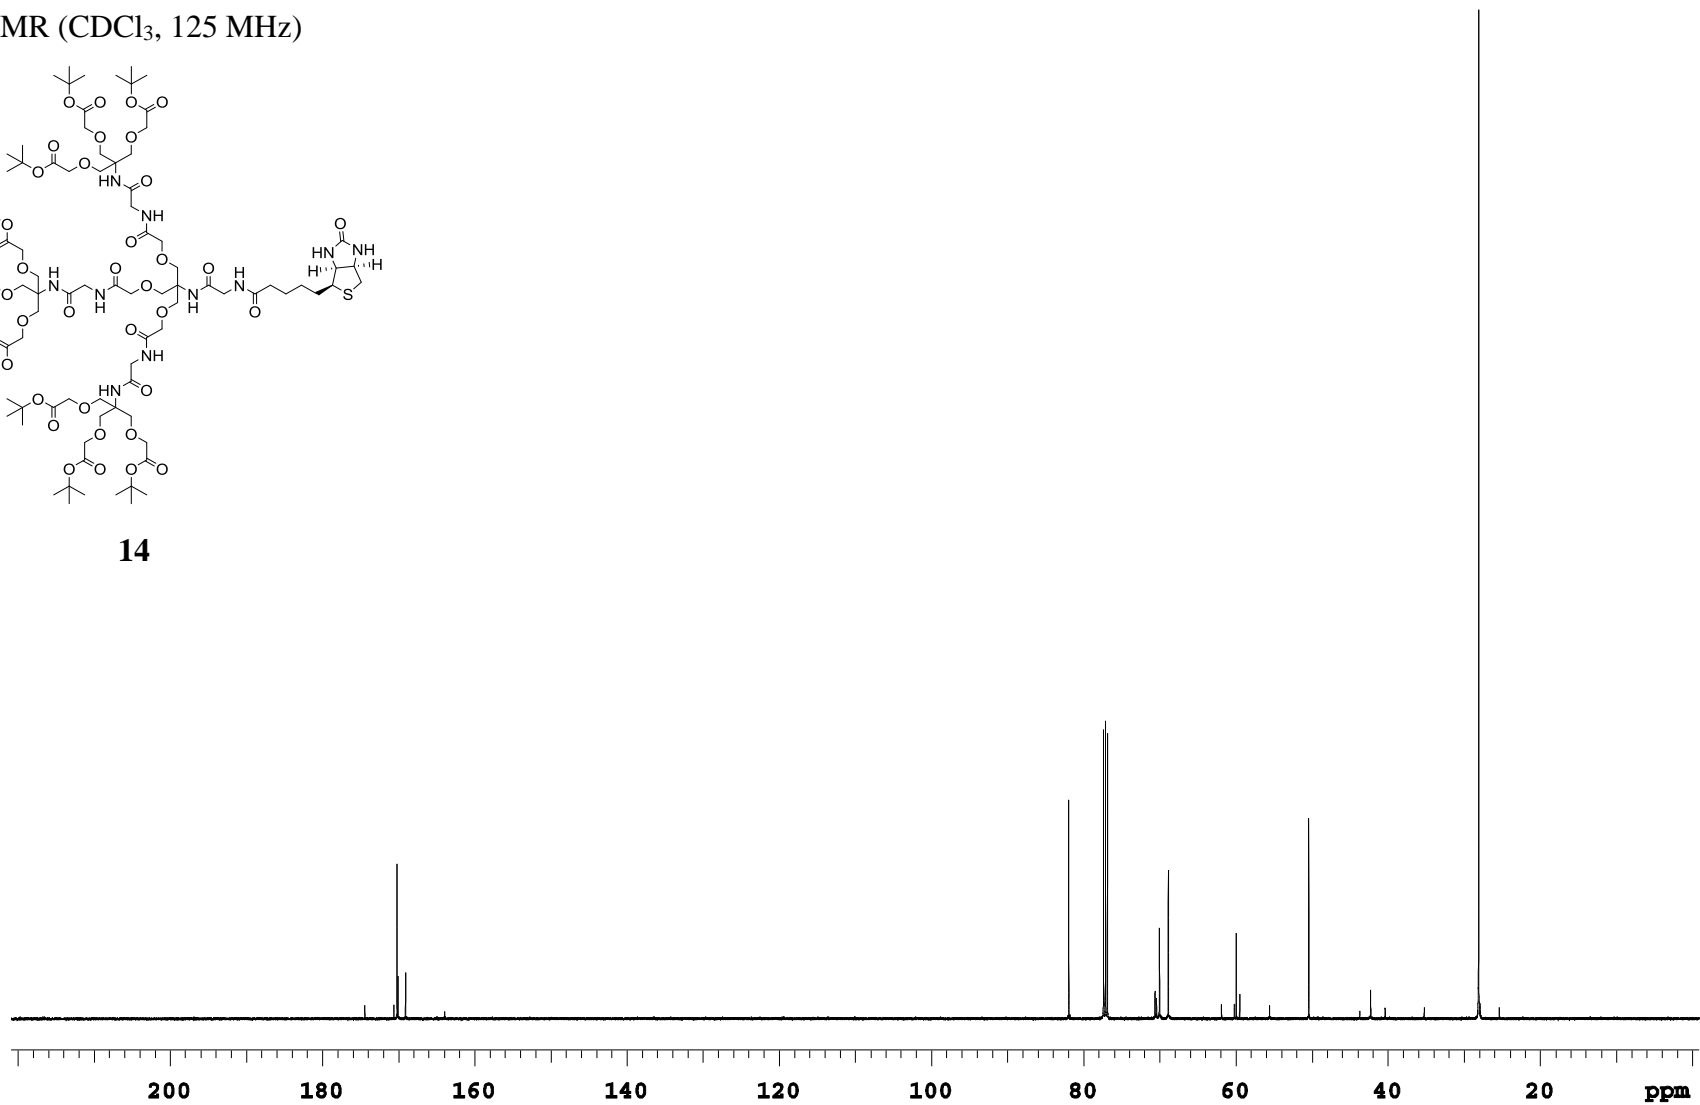

<sup>1</sup>H NMR (D<sub>2</sub>O, 500 MHz)

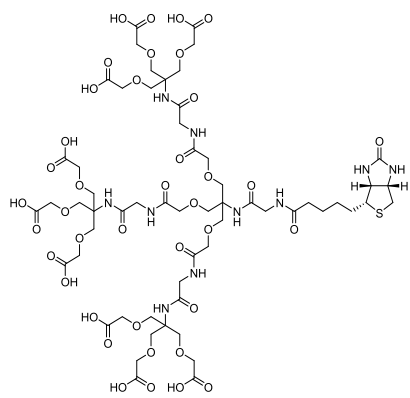

**15**

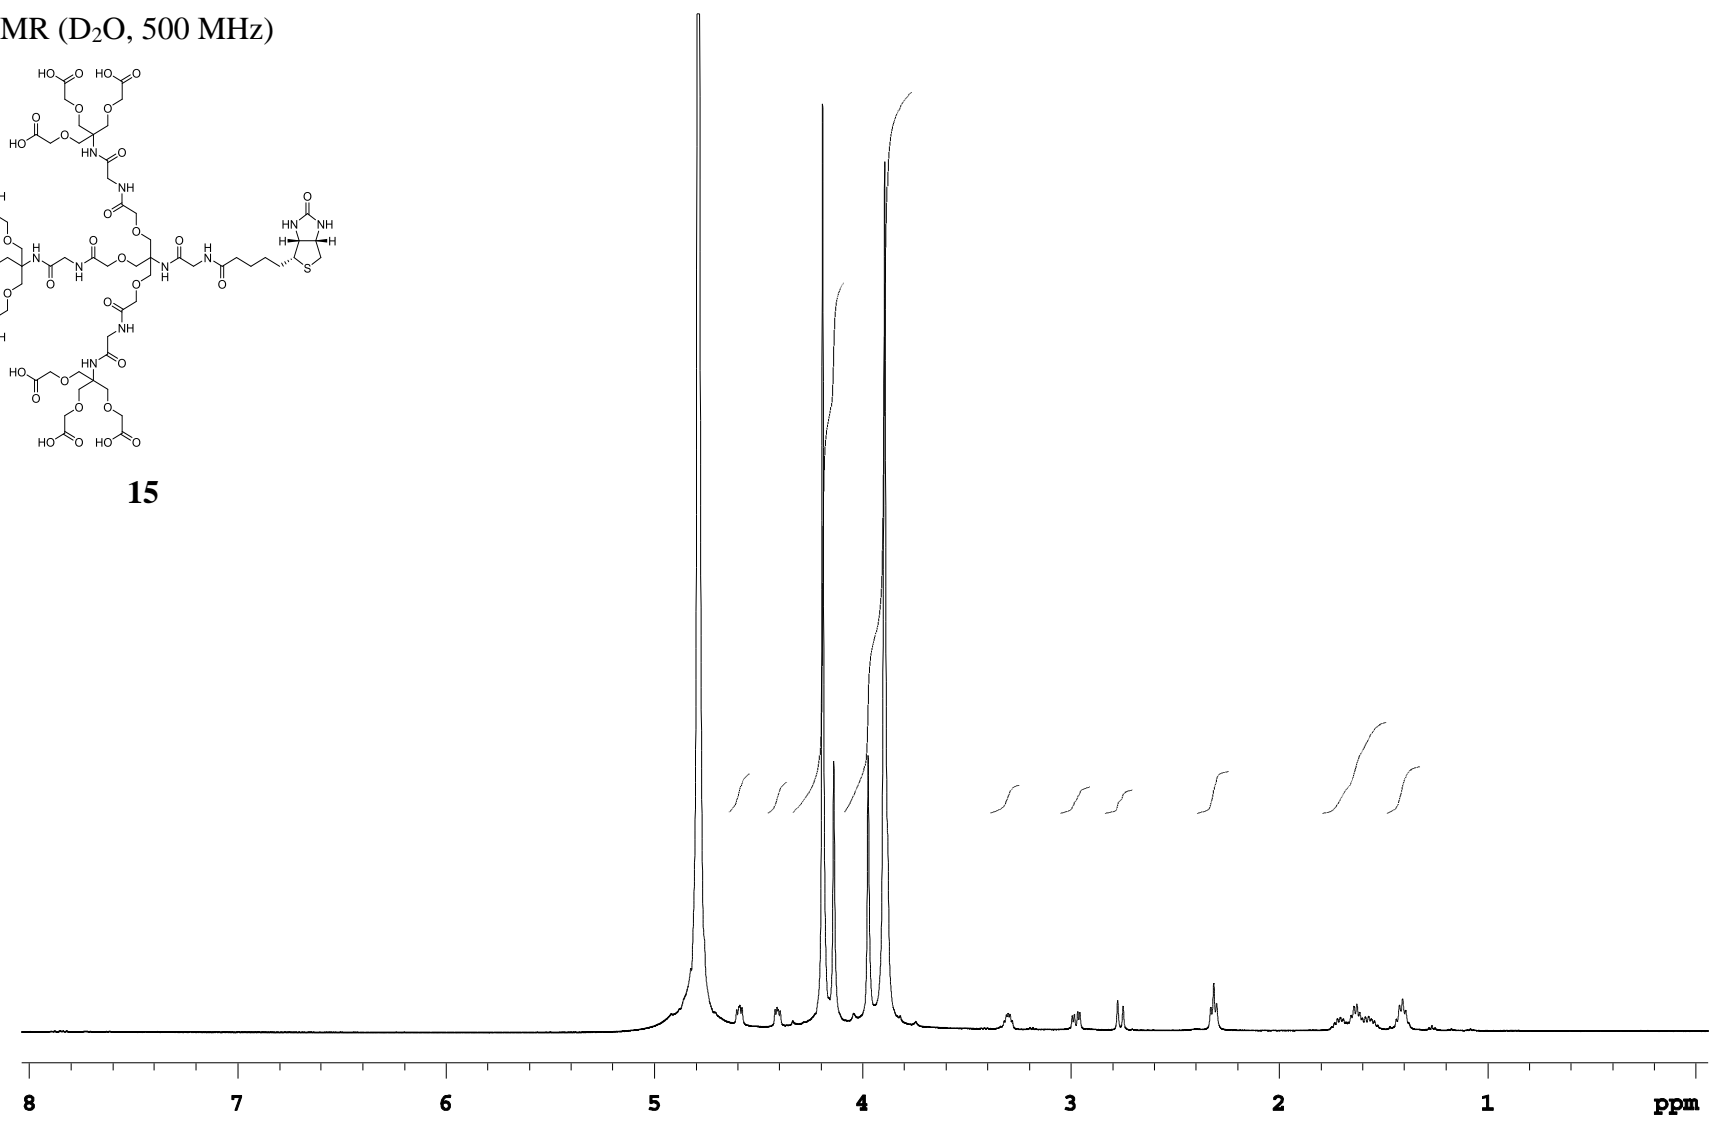

SI-14

$^{13}\text{C}$  NMR ( $\text{D}_2\text{O}$ , 125 MHz)

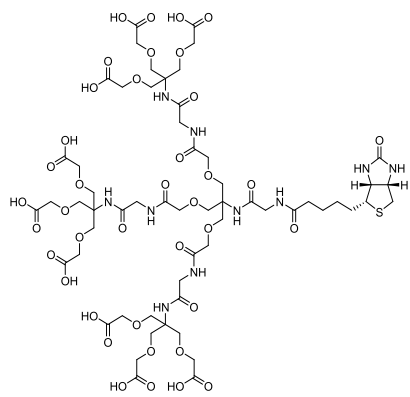

**15**

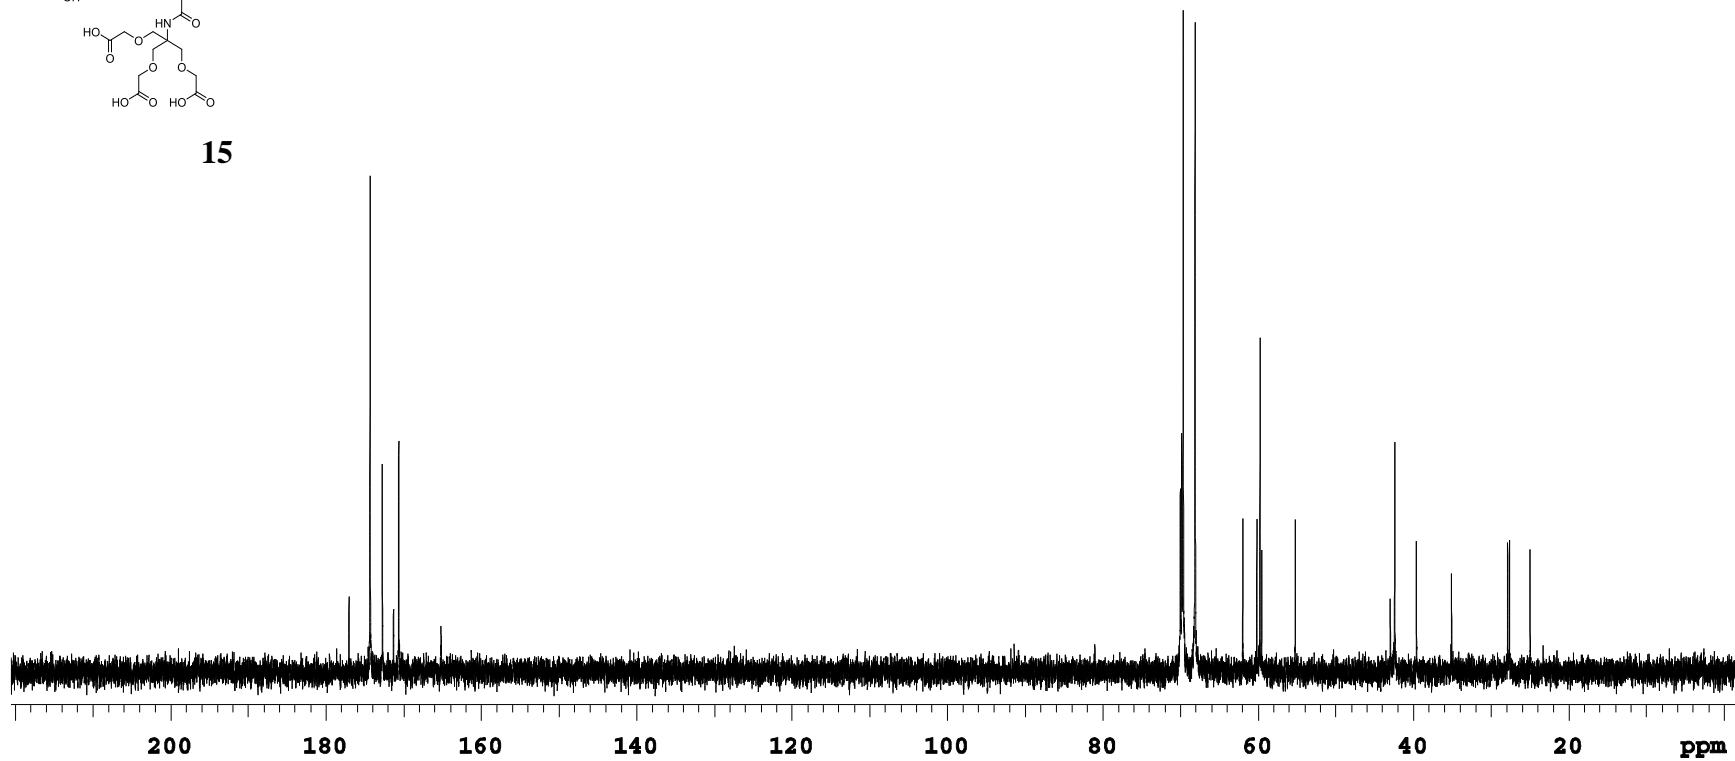

$^1\text{H}$  NMR ( $\text{D}_2\text{O}$ , 600 MHz)

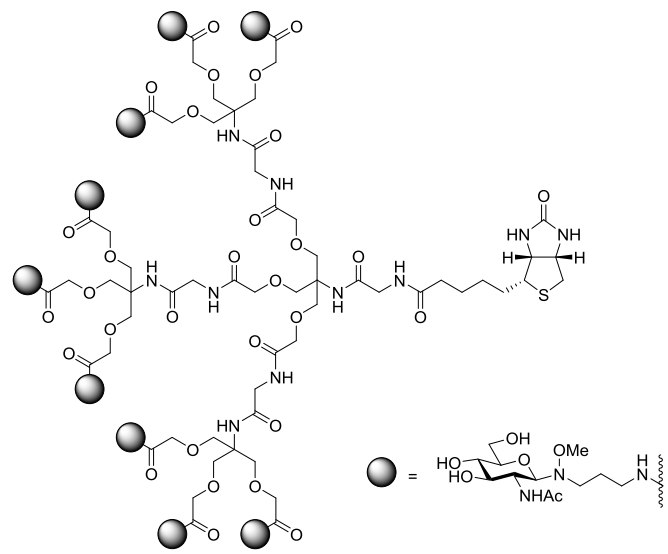

17

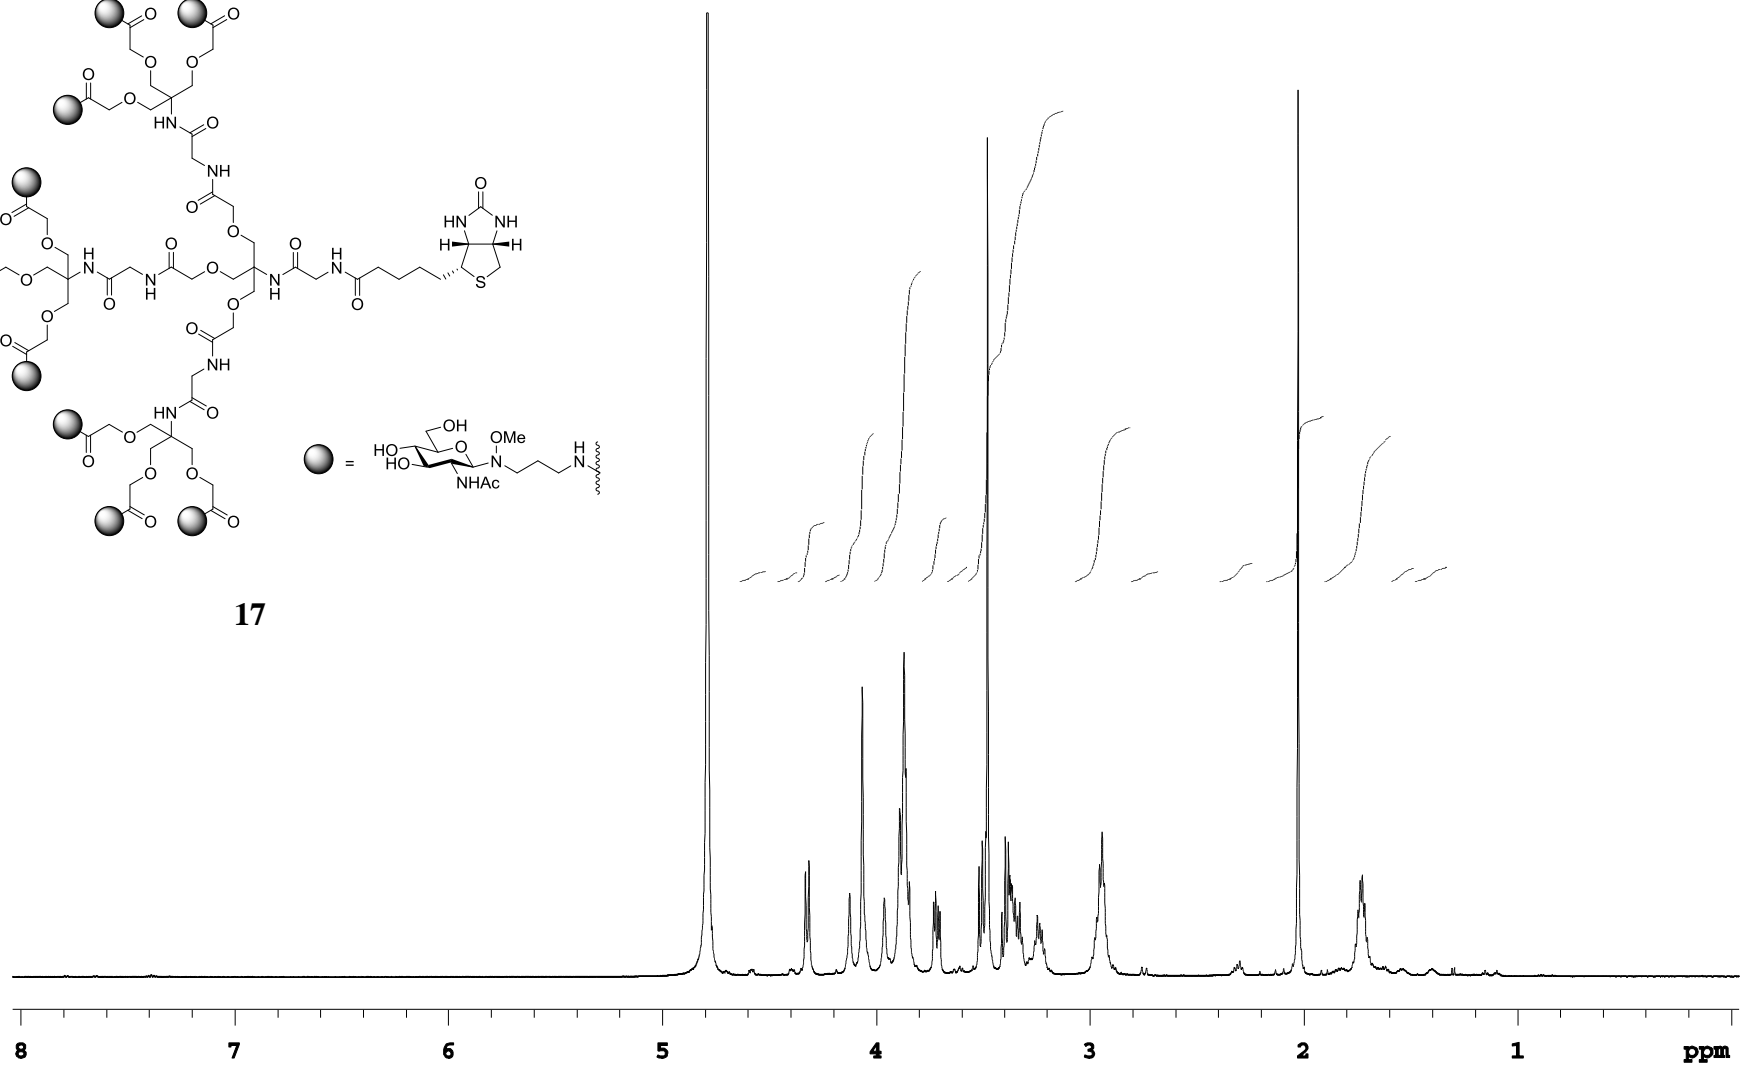



$^1\text{H}$  NMR ( $\text{D}_2\text{O}$ , 600 MHz)

HSQC 17

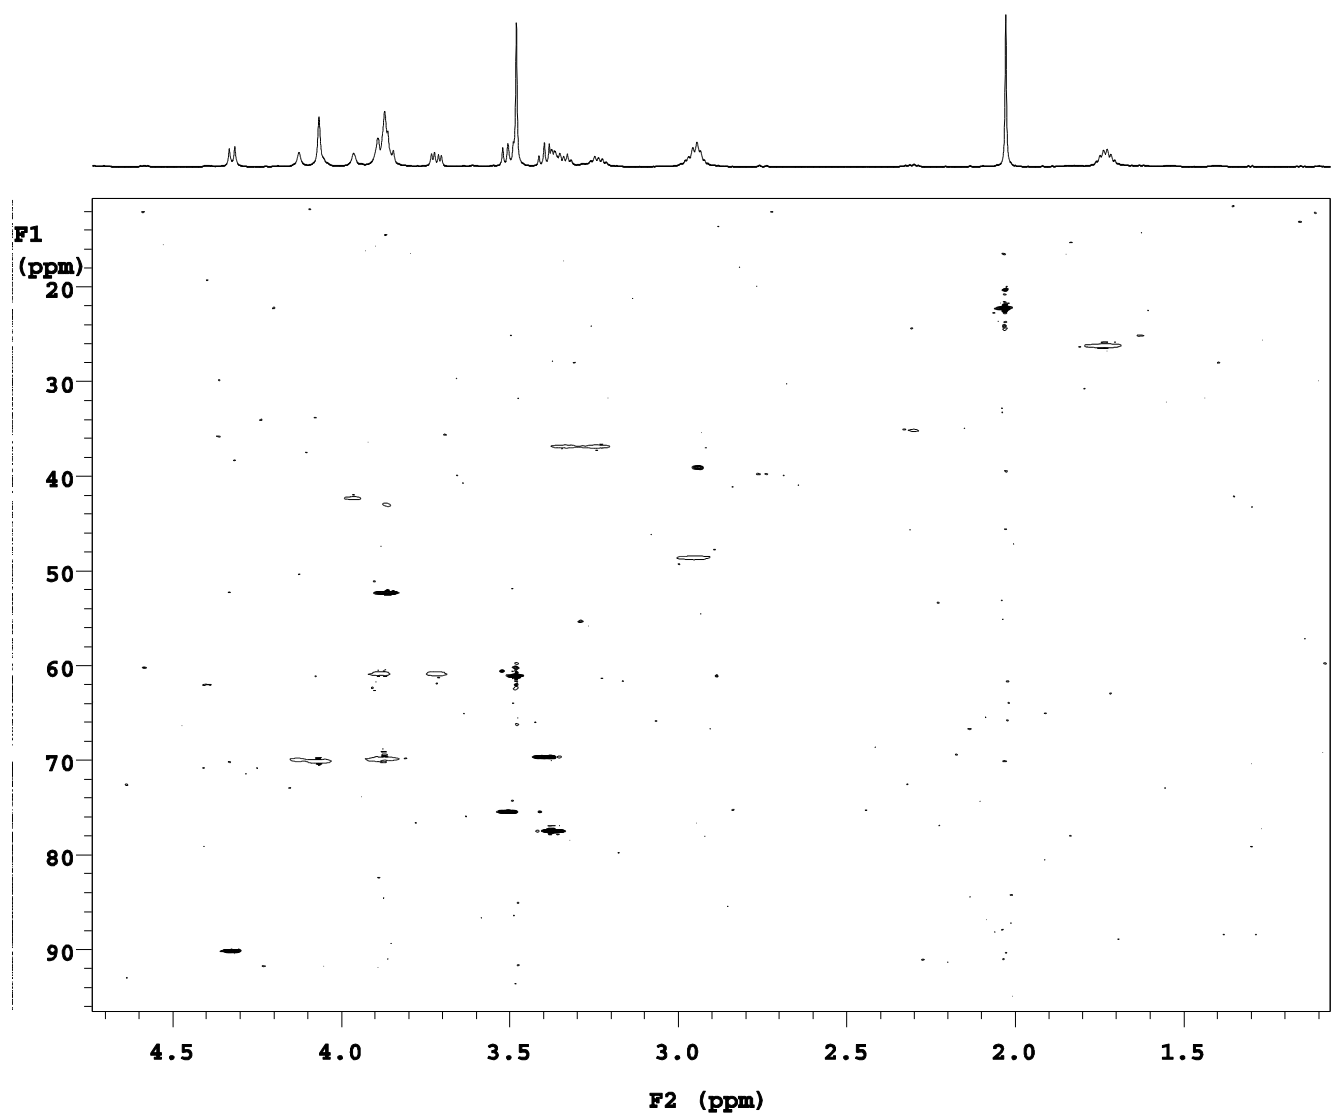

SI-17

$^1\text{H}$  NMR ( $\text{D}_2\text{O}$ , 500 MHz)

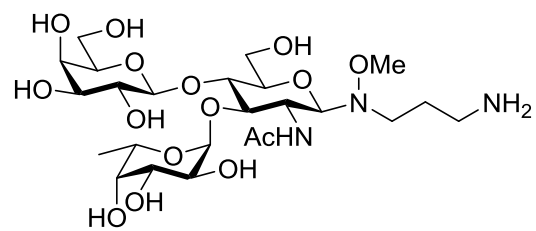

24

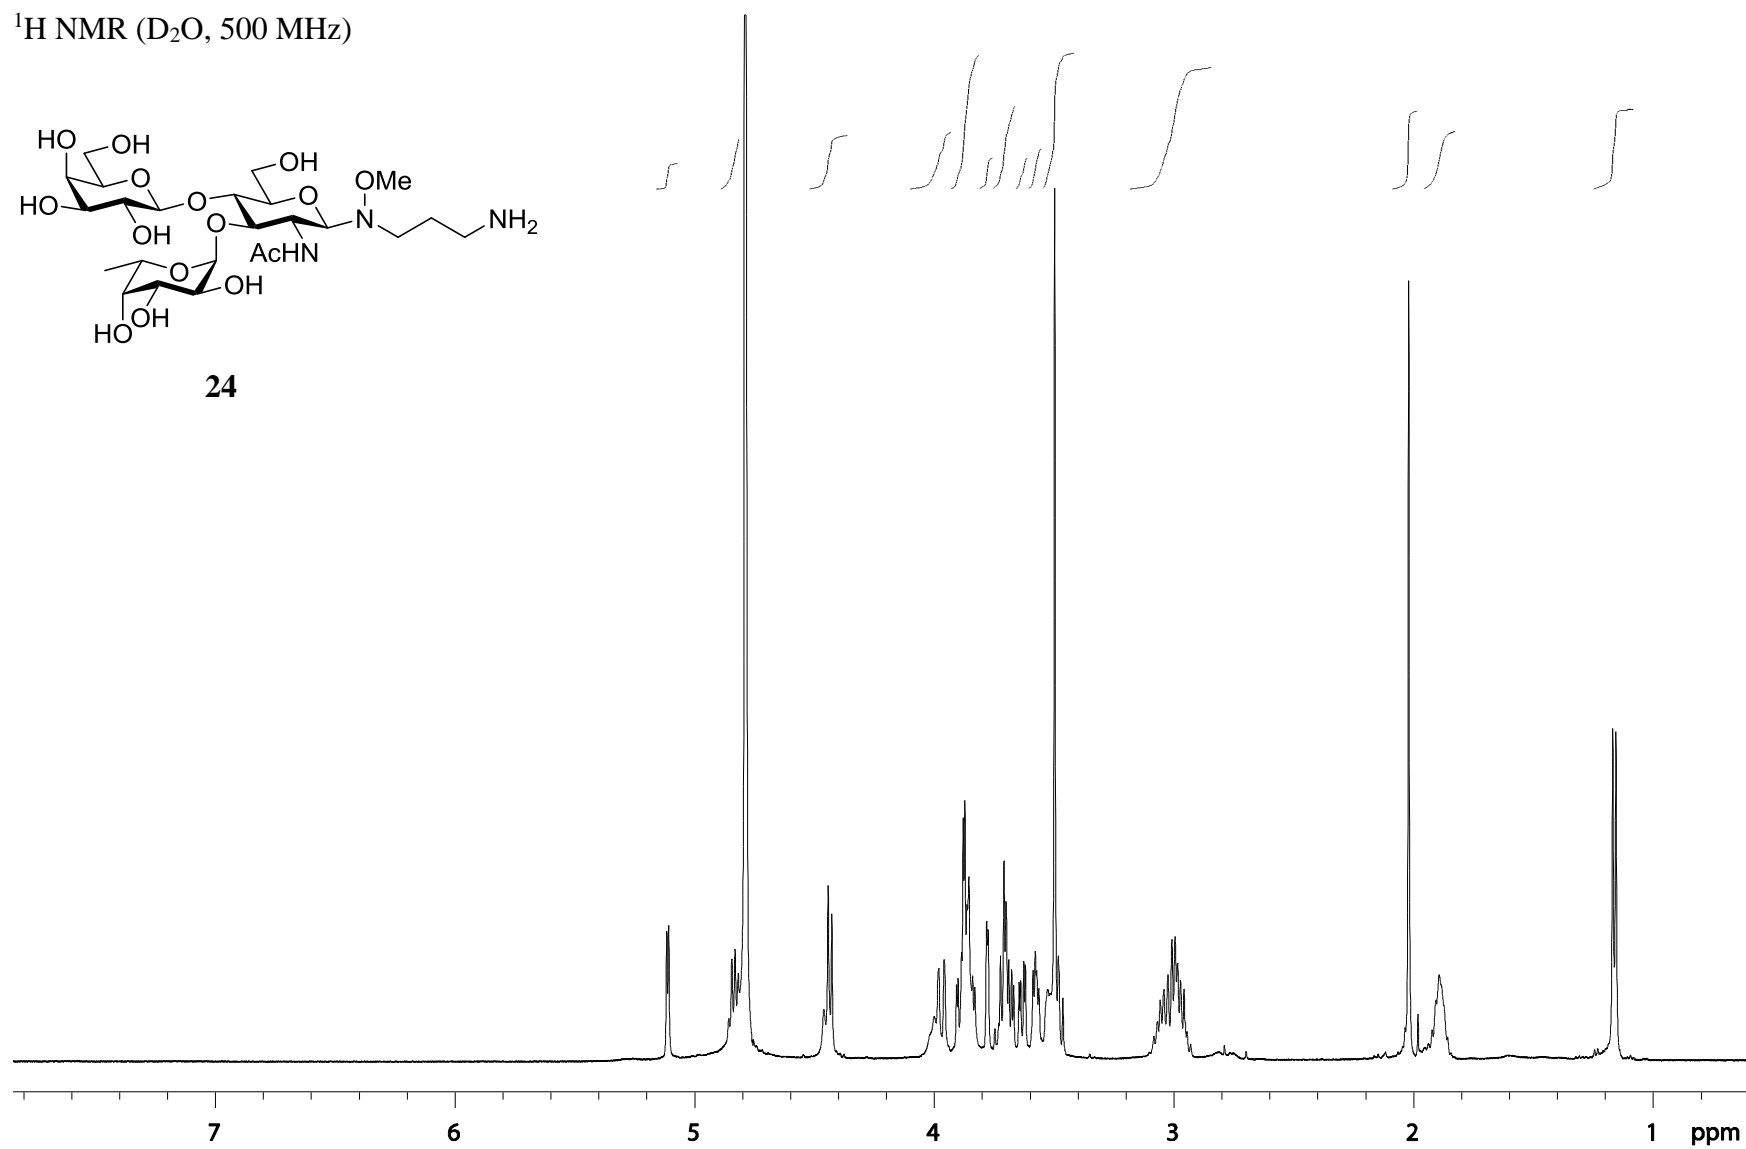

SI-18

$^{13}\text{C}$  NMR ( $\text{D}_2\text{O}$ , 125 MHz)

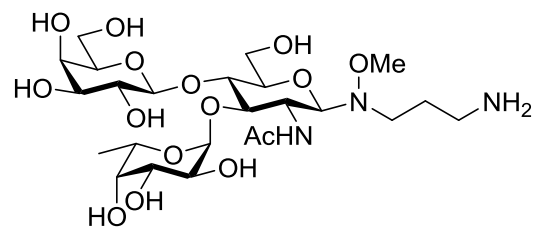

24

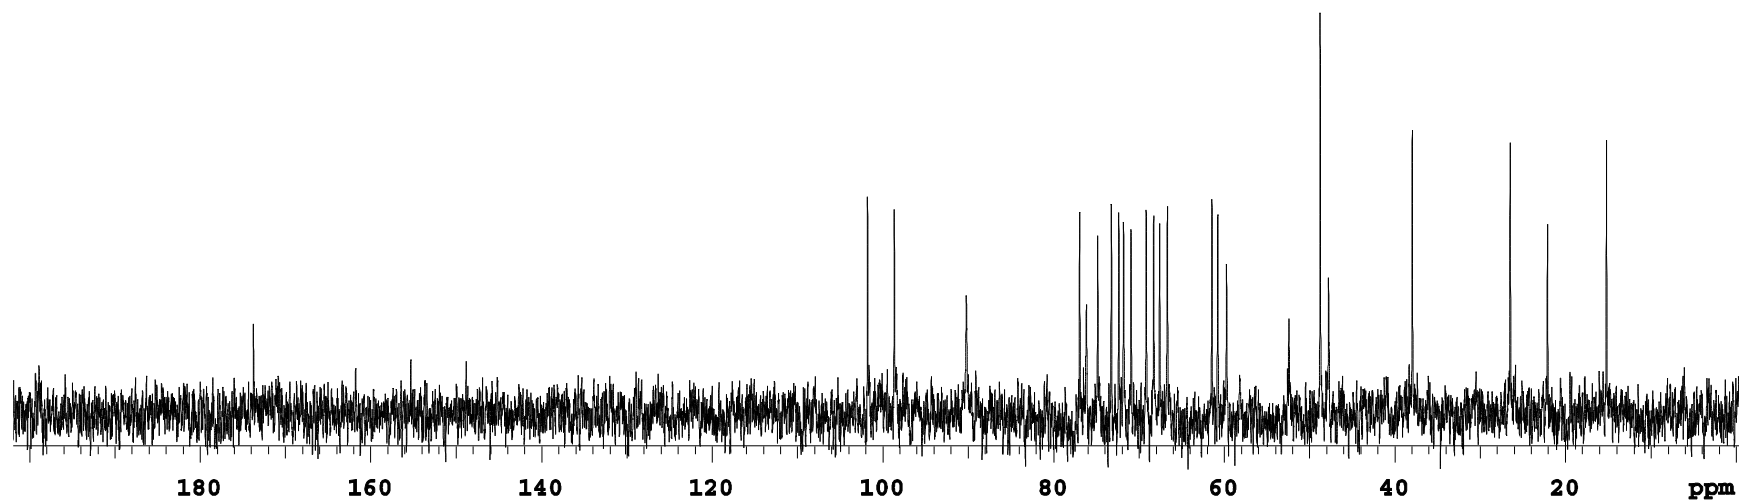

$^1\text{H}$  NMR ( $\text{D}_2\text{O}$ , 600 MHz)

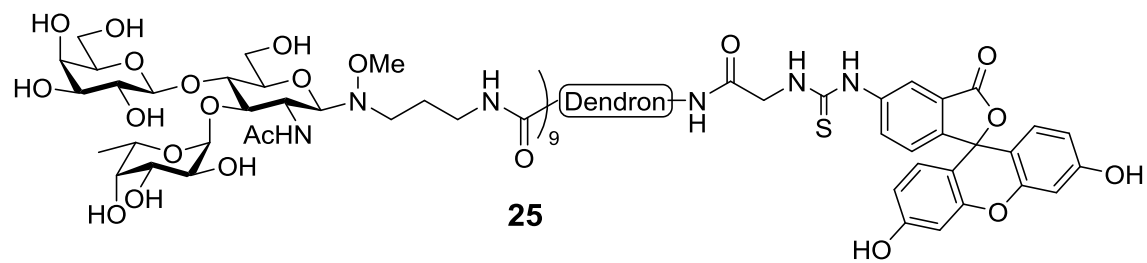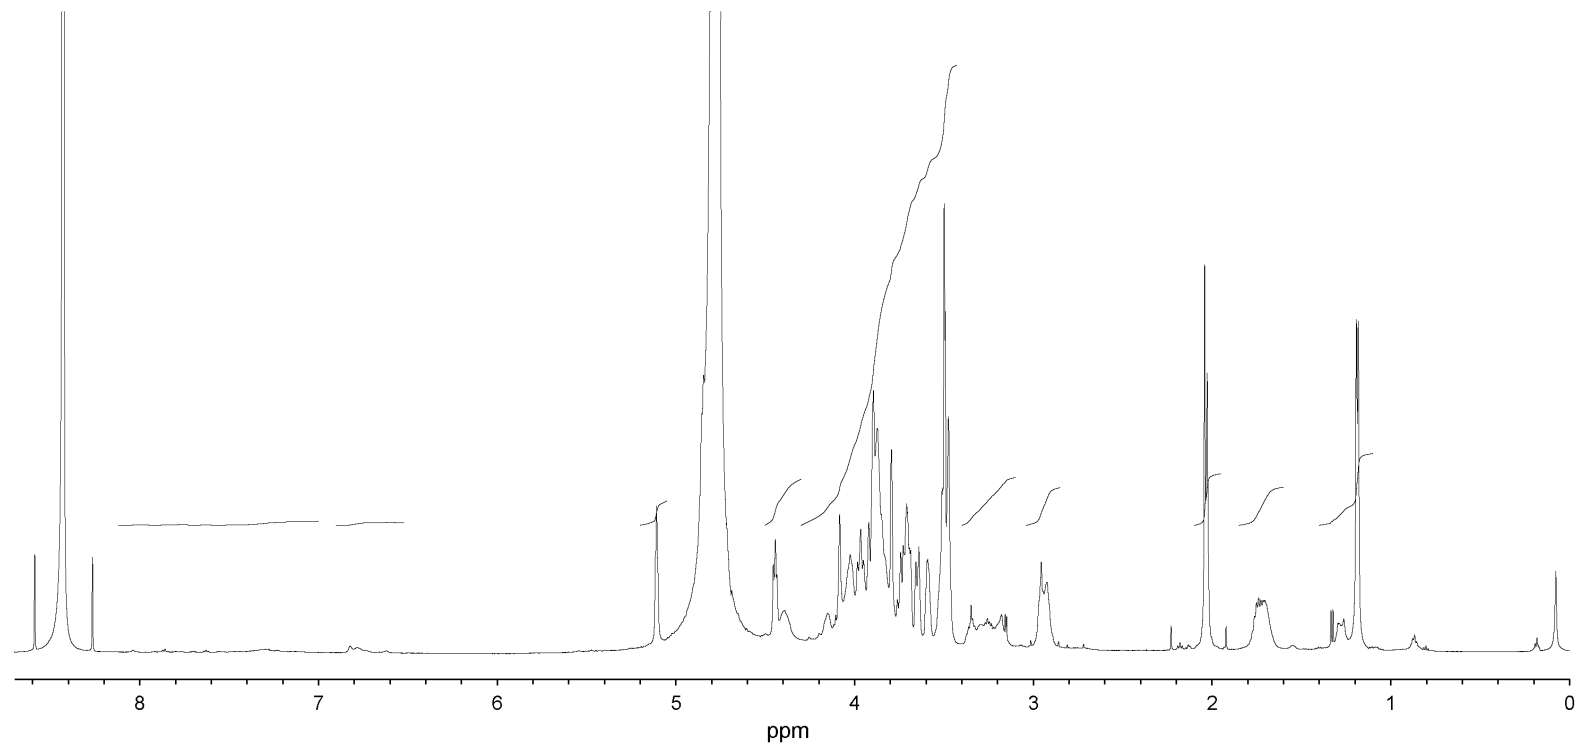

SI-20

HSQC (D<sub>2</sub>O, 600 MHz)

Glycodendron **25**

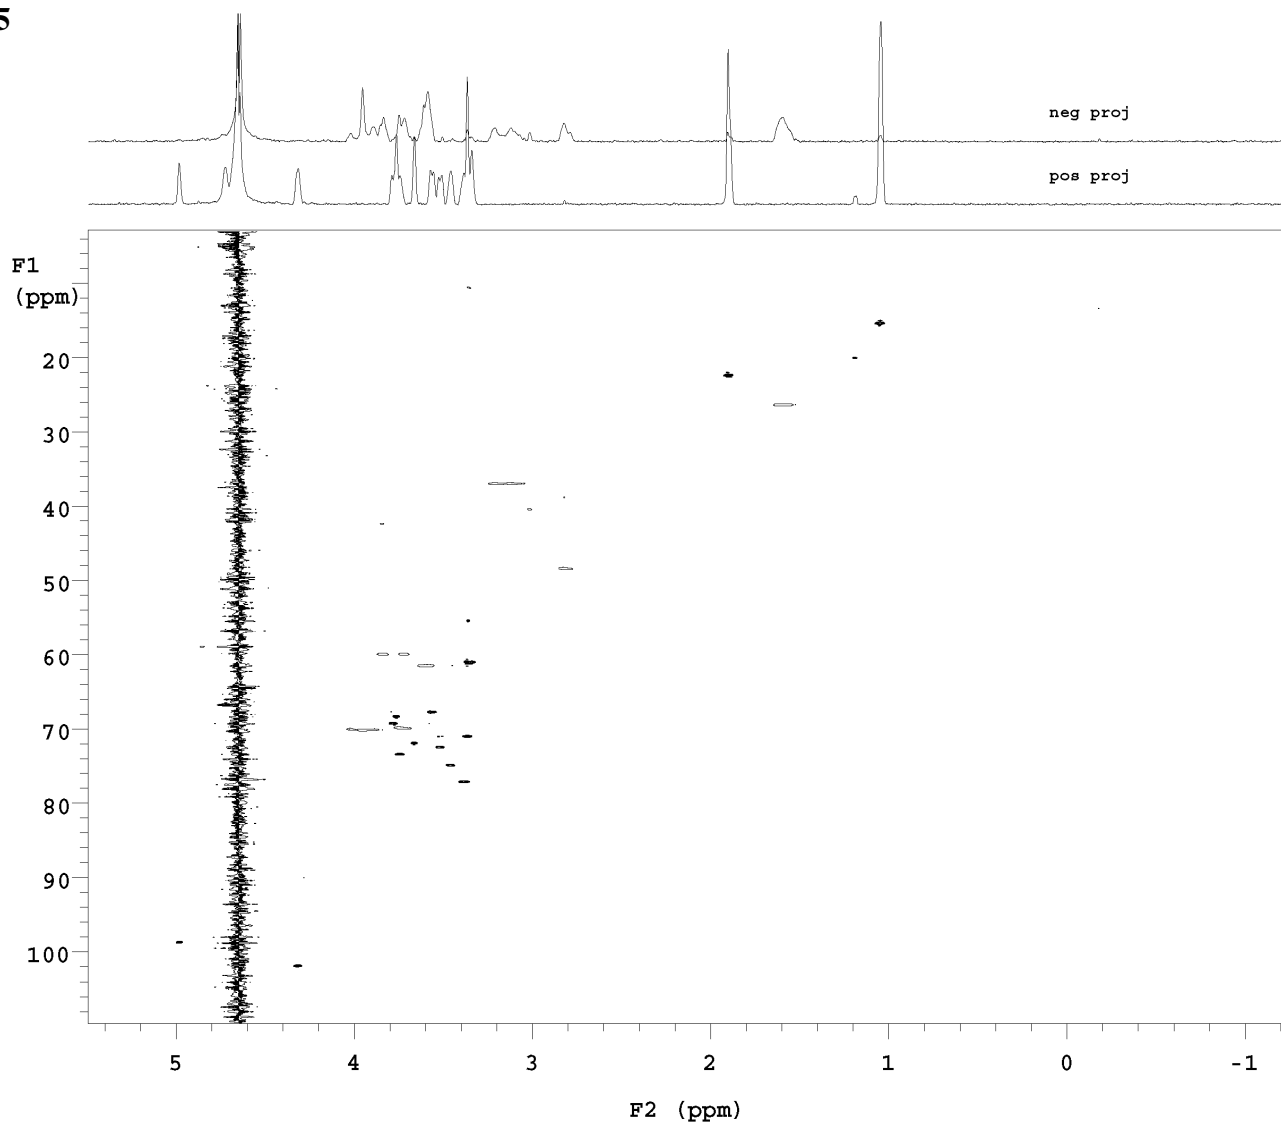

SI-21

# UV-VIS absorbance

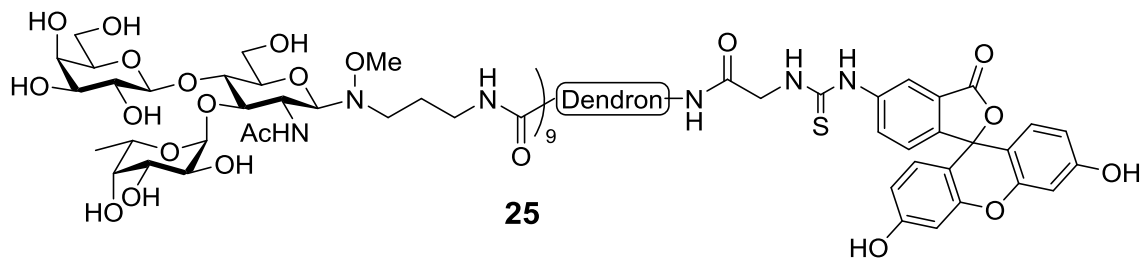

Overlaid Spectra:

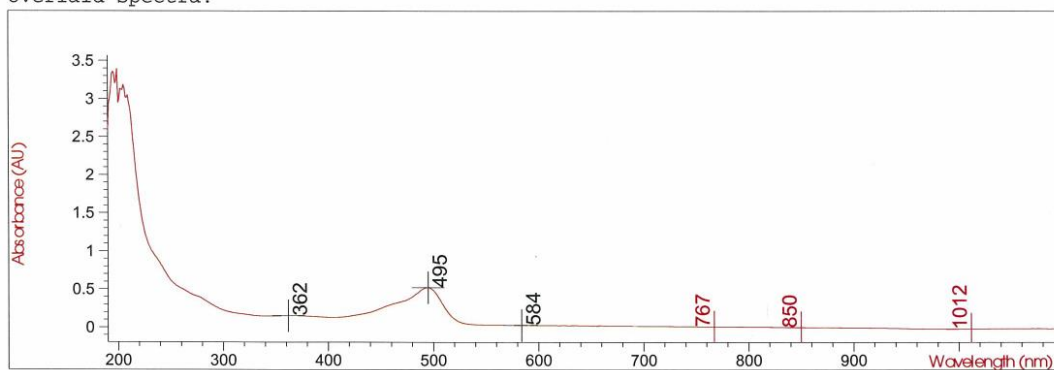

| # | Name | Peaks (nm) | Abs (AU)  | Valleys (nm) | Abs (AU)   |
|---|------|------------|-----------|--------------|------------|
| 1 |      | 495.0      | 0.52230   | 1012.0       | -2.0363E-2 |
| 1 |      | 362.0      | 0.15248   | 850.0        | 1.0519E-3  |
| 1 |      | 584.0      | 2.7593E-2 | 767.0        | 8.9579E-3  |
| 2 |      | 495.0      | 0.52230   | 1012.0       | -2.0363E-2 |
| 2 |      | 362.0      | 0.15248   | 850.0        | 1.0519E-3  |
| 2 |      | 584.0      | 2.7593E-2 | 767.0        | 8.9579E-3  |
